# Neural event segmentation of continuous experience in human infants

Tristan S. Yates<sup>1</sup>, Lena J. Skalaban<sup>1</sup>, Cameron T. Ellis<sup>1</sup>, Angelika J. Bracher<sup>2,3</sup>, Christopher Baldassano<sup>4</sup>, Nicholas B. Turk-Browne<sup>1,5\*</sup>

<sup>1</sup>Department of Psychology, Yale University; <sup>2</sup>Max Planck Institute for Human Cognitive and Brain Sciences; <sup>3</sup>Department of Child and Adolescent Psychiatry, Psychotherapy, and Psychosomatics, University of Leipzig; <sup>4</sup>Department of Psychology, Columbia University; <sup>5</sup>Wu Tsai Institute, Yale University

---

## Abstract

Although sensory input is continuous, we perceive and remember discrete events. Event segmentation has been studied extensively in adults, but little is known about how the youngest minds experience the world. The main impediment to studying event segmentation in infants has been a reliance on explicit parsing tasks that are not possible at this age. fMRI has recently proven successful at measuring adult event segmentation during task-free, naturalistic perception. Applied to infants, this could reveal the nature of their event segmentation, from low-level sensory transients to high-level cognitive boundaries. We collected fMRI data from 25 adults and 25 infants less than one year of age watching the same short movie. Neural events were defined by the stability of voxel activity patterns. In adults, we replicated a hierarchical gradient of event timescales, from shorter events in early visual regions to longer events in later visual and narrative regions. In infants, however, longer events were found throughout the brain, including in a second dataset. Infant event structure fit adult data and vice versa, but adult behavioral boundaries were differently expressed in adult and infant brains. These findings have implications for the nature of infant experience and cognition.

---

## Introduction

From the moment we are born, our sensory systems are bombarded with information. We overcome this perceptual challenge as adults by segmenting continuous experience into discrete events (Zacks, 2020), both online (Kurby and Zacks, 2008; Zacks et al., 2010) and after the fact (Clewett et al., 2019). Experience can be carved up at multiple timescales (Hard et al., 2006), allowing us to perceive the passage of long events (e.g., a talk from a visiting scientist) and to differentiate or integrate shorter events that comprise them (e.g., an impressive results slide or funny anecdote). The multiple timescales of event perception can be flexibly modulated by attentional states (Bailey et al., 2017) or goals (Hard et al., 2006). In turn, event structure helps with forming and organizing episodic memories, making adaptive decisions, and predicting the future (Shin and DuBrow, 2021).

The hierarchy of event processing found in adults may either be present at birth or built up over development. In adults, coarser event segmentation is associated with conceptual understanding (Hard et al., 2006), and may be important for the construction of abstract knowledge structures such as event schemas and narratives (Ghosh and Gilboa, 2014). The protracted development of narrative understanding (Nelson and Fivush, 2020) suggests that coarser event segmentation may not be developed in early childhood. Thus, infants may segment experience at its most sensory level, in reaction to transient changes in low-level prop-

---

\*For correspondence: [nicholas.turk-browne@yale.edu](mailto:nicholas.turk-browne@yale.edu)

41 erties. At the same time, infants are sensitive to complex event types such as human action sequences  
42 (Baldwin et al., 2001; Saylor et al., 2007; Stahl et al., 2014) and cartoon narratives (e.g., of a crab playing with  
43 a beach ball; Sonne et al. 2016, 2017). In one set of studies, infants recognized the similarity between target  
44 action segments and longer sequences that contained them, showing greater sensitivity to discrete actions  
45 (e.g., an object occlusion event) than to transitions between actions (e.g., an object sliding along the ground)  
46 (Hespos et al., 2009, 2010). Thus, there is some reason to believe that infant experience is structured into  
47 longer events. This fits with other work showing that infants and toddlers have longer temporal processing  
48 windows for vision (Farzin et al., 2011; Freschl et al., 2021) and multisensory information (Lewkowicz, 1996;  
49 Lewkowicz and Flom, 2014).

50 Behavioral measures such as looking time have expanded our understanding of infant event processing,  
51 yet can only provide indirect evidence and are overdetermined (Aslin, 2007). This makes it difficult to identify  
52 representations of events at multiple timescales. Neural measures provide a potential solution. Functional  
53 magnetic resonance imaging, for example, has proven excellent at capturing parallel representations rel-  
54 evant to event segmentation in adults (Stawarczyk et al., 2021). In one approach, behavioral boundaries  
55 from an overt parsing task are used as event markers to model fMRI activity during passive movie watch-  
56 ing. Regions such as the superior temporal sulcus and middle temporal area respond to events at different  
57 timescales (Zacks et al., 2001, 2006, 2010). An alternative approach discovers events in a data-driven man-  
58 ner (Baldassano et al., 2017; Geerligs et al., 2021). An unsupervised computational model learns stable  
59 neural event patterns in participants watching movies. This model can be fit to different regions across the  
60 brain to discover a range of event timescales. In adults, sensory regions process events on a short timescale,  
61 whereas higher-level regions process events on a longer timescale, mirroring the topography of temporal  
62 receptive windows (TRW; Hasson et al. 2008; Lerner et al. 2011; Himberger et al. 2018). Moreover, event  
63 boundaries in regions associated with narrative processing (such as the precuneus and posterior cingulate;  
64 Hasson et al. 2015) best match narrative changes in the movie (Baldassano et al., 2017).

65 Although fMRI has enhanced our understanding of event segmentation in adults, it has traditionally not  
66 been used for this purpose in infants. EEG is often used instead. For example, it has shown that the in-  
67 fant brain is sensitive to pauses that disrupt familiar and novel goal-directed actions (Reid et al., 2007; Pace  
68 et al., 2013). The timing of event-related potentials (ERPs) to disrupted novel events indicated a hierarchy  
69 of event processing in adults that was similar but not the same as infants (Pace et al., 2013). Infants also  
70 show greater attention and different ERPs to pauses at the end of novel actions compared to pauses within  
71 an event (Pace et al., 2020). The strength of EEG is that it can precisely determine when during continu-  
72 ous experience infants segment events. However, its limited spatial resolution and sensitivity to signals  
73 near the scalp constrain the types of representations that can be probed. In particular, many of the key  
74 regions for event segmentation are away from the scalp, including subcortical structures such as the hip-  
75 pocampus (Ben-Yakov and Henson, 2018) and midline regions such as the precuneus and medial prefrontal  
76 cortex (Baldassano et al., 2017, 2018). fMRI produces rich, whole-brain data that, when applied to infants,  
77 could reveal aspects of event perception that may not otherwise be accessible (Yates et al., 2021). fMRI in  
78 awake infants is much rarer than in adults because of experimental and technical challenges, but is possible  
79 (Dehaene-Lambertz, 2002; Biagi et al., 2015; Deen et al., 2017; Ellis et al., 2020a,d).

80 In this study, we collected movie-watching fMRI data from infants under one year old to investigate the  
81 early development of event perception during continuous, naturalistic experience. We collected fMRI data  
82 from adults who watched the same movie, as a comparison set, and from infants and adults in a second  
83 movie, to test for generalization. Our first question was whether the movie would be processed reliably  
84 across participants. As an initial check, we predicted that neural responses would be correlated across  
85 adults throughout the brain, including in sensory and narrative regions (Hasson et al., 2004). Infant eye  
86 movements are less consistent than adults during movie-watching (Kirkorian et al., 2012; Franchak et al.,  
87 2016), and thus we expected lower or perhaps even absent intersubject correlation across infants. Our  
88 second question was about the presence and timescale of event boundaries across participants. We sought  
89 to replicate previous adult work showing a hierarchical gradient of timescales in event processing across  
90 regions, though here with a shorter, infant-friendly animated video. With this comparison in hand, we  
91 could then test whether and where in the brain the same boundaries and timescales exist in infants. One

92 possibility is that infant event structure is similar to adults only in early visual regions. Indeed, we recently  
93 found that retinotopy — a hallmark of visual cortex organization — is nearly adult-like in infants (Ellis et al.,  
94 2020b). Another possibility is that infants have similar event structure to adults in higher-order regions  
95 associated with narratives, given their sensitivity to causal relations and goals (Baillargeon et al., 2016).

## 96 **Results**

### 97 **Intersubject correlation reveals reliable neural responses in infants**

98 We scanned infants ( $N = 25$ ; 3.6–12.7 months) and adults ( $N = 25$ ; 18–32 years) while they watched a short,  
99 silent movie (“Aeronaut”) that had a complete narrative arc. To investigate the consistency of infants’ neural  
100 responses during movie-watching, we performed leave-one-out intersubject correlation (ISC), in which the  
101 voxel activity of each individual participant was correlated with the average voxel activity of all other partic-  
102 ipants (Hasson et al., 2004). This analysis was performed separately in adults and infants for every voxel in  
103 the brain and then averaged within eight regions of interest (ROIs), spanning from early visual cortex (EVC)  
104 to later visual regions (lateral occipital cortex, LOC), high-level amodal regions (angular gyrus, AG; poste-  
105 rior cingulate cortex, PCC; precuneus; medial prefrontal cortex, mPFC) and the hippocampus. Because the  
106 movie was silent, we used early auditory cortex (EAC) as a control region.

107 Whole-brain ISC was highest in visual regions in adults (Figure 1A), similar to prior studies with movies  
108 (Hasson et al., 2004; Chen et al., 2017). That said, all eight ROIs were statistically significant in adults (EVC:  $M$   
109  $= 0.492$ ,  $CI = [0.444, 0.535]$ ,  $p < 0.001$ ; LOC:  $M = 0.427$ ,  $CI = [0.389, 0.464]$ ,  $p < 0.001$ ; AG:  $M = 0.091$ ,  $CI = [0.058,$   
110  $0.120]$ ,  $p < 0.001$ ; PCC:  $M = 0.143$ ,  $CI = [0.098, 0.184]$ ,  $p < 0.001$ ; precuneus:  $M = 0.155$ ,  $CI = [0.121, 0.189]$ ,  
111  $p < 0.001$ ; mPFC:  $M = 0.063$ ,  $CI = [0.041, 0.087]$ ,  $p < 0.001$ ; hippocampus:  $M = 0.042$ ,  $CI = [0.028, 0.058]$ ,  $p <$   
112  $0.001$ ; EAC:  $M = 0.087$ ,  $CI = [0.054, 0.119]$ ,  $p < 0.001$ ). These results are consistent with prior movie-watching  
113 studies, albeit with a much shorter movie here, for all ROIs except EAC. We speculate on why we found  
114 significant ISC in EAC during a silent movie in the Discussion.

115 ISC was weaker overall in infants than adults, but again higher in visual regions compared to other re-  
116 gions. All ROIs except for EAC were statistically significant in infants, and hippocampus was marginally  
117 significant (EVC:  $M = 0.251$ ,  $CI = [0.168, 0.332]$ ,  $p < 0.001$ ; LOC:  $M = 0.181$ ,  $CI = [0.116, 0.242]$ ,  $p < 0.001$ ; AG:  
118  $M = 0.085$ ,  $CI = [0.032, 0.134]$ ,  $p = 0.002$ ; PCC:  $M = 0.091$ ,  $CI = [0.047, 0.142]$ ,  $p < 0.001$ ; precuneus:  $M = 0.079$ ,  
119  $CI = [0.038, 0.120]$ ,  $p < 0.001$ ; mPFC:  $M = 0.073$ ,  $CI = [0.024, 0.116]$ ,  $p = 0.003$ ; hippocampus:  $M = 0.046$ ,  $CI =$   
120  $[0.000, 0.093]$ ,  $p = 0.054$ ; EAC:  $M = 0.023$ ,  $CI = [-0.014, 0.056]$ ,  $p = 0.189$ ). Nonetheless, there were differences  
121 between the adult and infant groups. ISC was significantly higher in adults than infants in EVC ( $M = 0.241$ ,  
122 permutation  $p < 0.001$ ), LOC ( $M = 0.246$ ,  $p < 0.001$ ), precuneus ( $M = 0.076$ ,  $p = 0.007$ ), and EAC ( $M = 0.064$ ,  
123  $p = 0.011$ ); all other regions did not exhibit different ISC between groups (AG:  $M = 0.006$ ,  $p = 0.859$ ; PCC:  
124  $M = 0.052$ ,  $p = 0.135$ ; mPFC:  $M = -0.010$ ,  $p = 0.697$ ; hippocampus:  $M = -0.005$ ,  $p = 0.864$ ). In sum, there is  
125 strong evidence of a shared response across infants, not just in visual regions, but also in regions involved  
126 in narrative processing in adults.

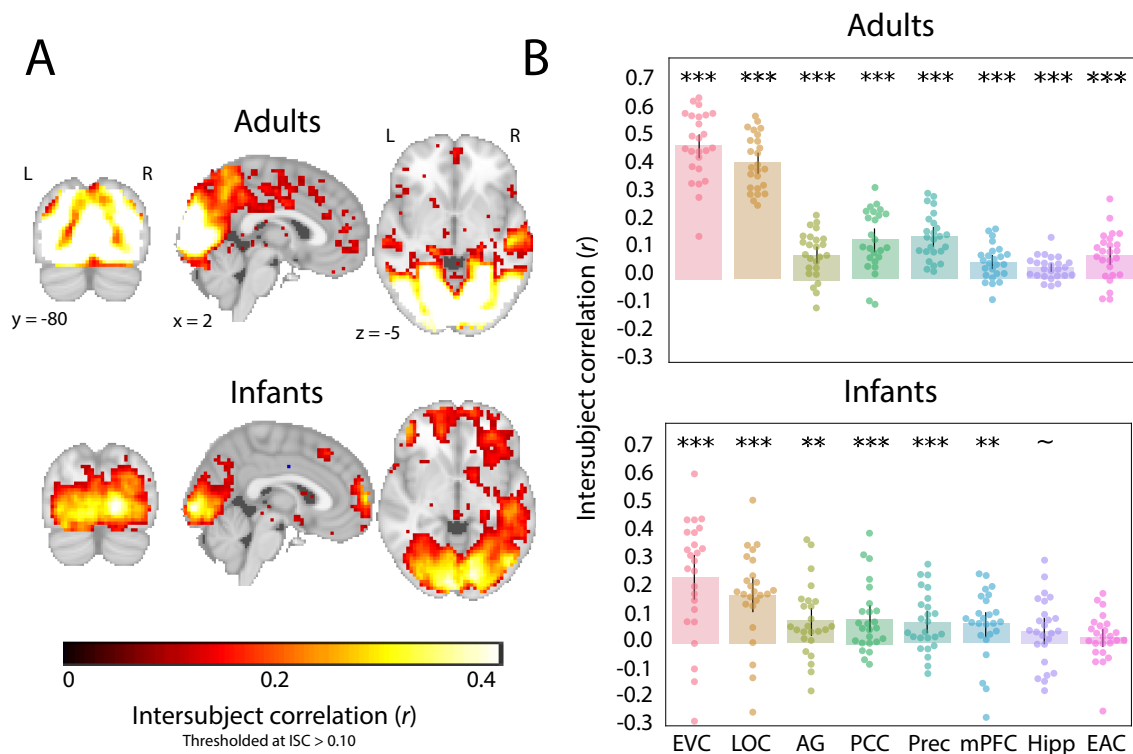

127

**Figure 1.** Average leave-one-out intersubject correlation (ISC) in adults and infants. (A) Voxel-wise ISC values in the two groups, thresholded arbitrarily at a mean correlation value of 0.10 to visualize the distribution across the whole brain. (B) ISC values were significant in both adults and infants across ROIs (except EAC in infants). Dots represent individual participants and error bars represent 95% CIs of the mean from bootstrap resampling. \*\*\*  $p < 0.001$ , \*\*  $p < 0.01$ , \*  $p < 0.05$ , ~  $p < 0.1$ . ROIs: primary visual cortex (EVC), lateral occipital cortex (LOC), angular gyrus (AG), posterior cingulate cortex (PCC), precuneus (Prec), medial prefrontal cortex (mPFC), hippocampus (Hipp), primary auditory cortex (EAC).

128

### 129 Gradient of event processing is absent in the infant brain

130

131 Given that infants process the movie in a similar way to one another, we next asked whether their neural  
 132 activity contains evidence of event segmentation, as in adults. Our analysis tested whether infant brains  
 133 transition through discrete event states characterized by stable voxel activity patterns, which then shift into  
 134 new stable activity patterns at event boundaries. We used a computational model to characterize the stable  
 135 neural event patterns of infant and adult brains (Baldassano et al., 2017). We analyzed the data from infant  
 136 and adult groups separately. Within each group, we first split the data in half, with one set of participants  
 137 forming a training set and the other forming a test set. In a searchlight analysis, we applied the model to the  
 138 training set using a range of event numbers from 2 to 21, and then applied the learned event segmentation  
 139 to the test set. Model fit was assessed by the log probability of the test data according to the learned event  
 140 segmentation (referred to as the log-likelihood). We iterated this splitting process 24 times, switching which  
 141 participants were used in the training and test sets, and then assigned to each voxel the number of events  
 142 that maximized the log-likelihood of the model across iterations. This same pipeline was performed at the  
 143 ROI level using the pattern of voxel activity from all voxels that made up an ROI, rather than the voxels  
 144 contained in a searchlight.

144

145 In adults, despite the movie being substantially shorter, we replicated previous work showing a gradient  
 146 of event granularity across cortex, with more events in early visual compared to narrative regions (Figure  
 147 2A). In infants, we did not find strong evidence of a gradient. In fact, the model performed optimally with  
 fewer, longer events across the brain, including in visual regions (Figure 2B).

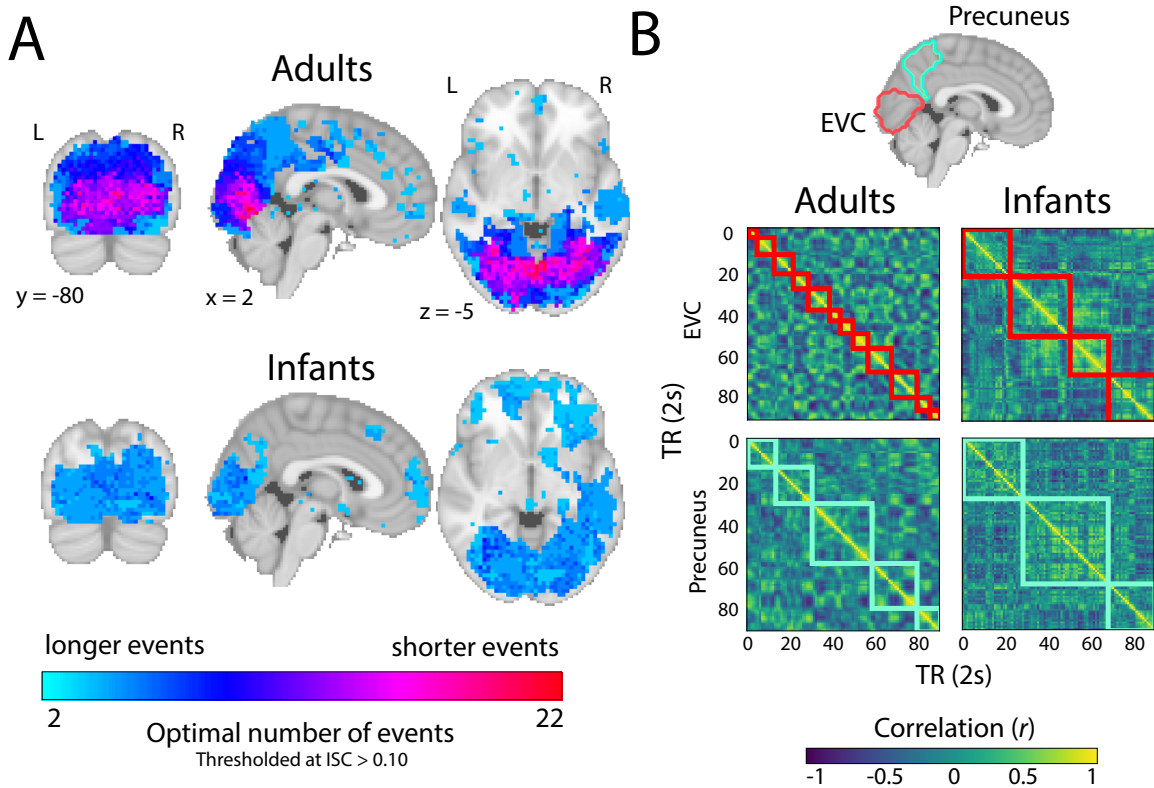

148

**Figure 2.** Event structure across the adult and infant brain. (A) The optimal number of events for a given voxel was determined via a searchlight across the brain, which found the number of events that maximized the model log-likelihood in held-out data. Voxels with an average ISC value greater than 0.10 are plotted for visualization purposes. In adults, there was a clear difference in the number of events found in early visual regions vs. narrative regions, but this was not present in infants. (B) Example timepoint-by-timepoint correlation matrices in EVC and precuneus in the two groups. The model event boundaries found for each age group are outlined in red (EVC) and aqua (precuneus).

149

### Coarser but reliable event structure across brain regions in infants

150

The above analysis provides a qualitative description of the timescale of event processing in the infant brain. However, comparing the *relative* model fits for different timescales does not allow us to assess whether the model fit at the optimal timescale is significantly above chance. To quantify whether these learned events truly demarcated state changes in neural activity patterns, we used nested cross-validation. For each ROI, we followed the steps above for finding the optimal number of events, but critically, held one participant out of the analysis completely (and iterated so each participant was held out once). On each leave-one-participant-out iteration, the number of optimal events in the remaining N-1 training participants could vary; the held-out participant had no impact on the learned event model. The model with the optimal event structure was then fit to the held-out participant's data and to time-shifted permutations of their data. A z-score of the log-likelihood for the actual result versus the permuted (null) distribution was calculated to determine whether the learned event structure generalized to a new participant better than chance (Figure 3A). This analysis can tell us whether the smaller number of events observed in infants reflects true differences in processing granularity between adults and infants, or results from combining across infants who have idiosyncratic event structures<sup>1</sup>.

151

Overall, the models for different ROIs reliably fit independent data (Figure 3B). All ROIs except hippocampus were significant in adults (EVC:  $M = 4.79$ ,  $CI = [4.48, 5.10]$ ,  $p < 0.001$ ; LOC:  $M = 5.52$ ,  $CI = [5.20, 5.81]$ ,  $p < 0.001$ ; AG:  $M = 4.97$ ,  $CI = [4.39, 5.47]$ ,  $p < 0.001$ ; PCC:  $M = 3.05$ ,  $CI = [2.29, 3.75]$ ,  $p < 0.001$ ; precuneus:  $M = 4.64$ ,  $CI = [4.22, 5.06]$ ,  $p < 0.001$ ; mPFC:  $M = 3.03$ ,  $CI = [2.09, 3.90]$ ,  $p < 0.001$ ; hippocampus:  $M = 0.711$ ,  $CI =$

152

153

154

155

156

157

158

159

160

161

162

163

164

165

166

167

168

<sup>1</sup>In simulated data, the model tended to over-estimate the optimal number of events when noise increased. (Appendix 1 Figure 1). This suggests that the smaller number of events in infants was not because of increased noise per se.

169 [-0.023, 1.41],  $p = 0.058$ ; EAC:  $M = 3.79$ ,  $CI = [3.31, 4.19]$ ,  $p < 0.001$ ). This was also true for infants, except in  
 170 PCC and hippocampus (EVC:  $M = 3.29$ ,  $CI = [2.61, 3.95]$ ,  $p < 0.001$ ; LOC:  $M = 4.76$ ,  $CI = [4.07, 5.39]$ ,  $p < 0.001$ ;  
 171 AG:  $M = 2.35$ ,  $CI = [1.73, 2.99]$ ,  $p < 0.001$ ; PCC:  $M = 0.545$ ,  $CI = [-0.110, 1.24]$ ,  $p = 0.106$ ; precuneus:  $M = 3.27$ ,  $CI$   
 172  $= [2.21, 4.18]$ ,  $p < 0.001$ ; mPFC:  $M = 1.42$ ,  $CI = [0.493, 2.29]$ ,  $p < 0.001$ ; hippocampus:  $M = 0.172$ ,  $CI = [-0.506,$   
 173  $0.612]$ ,  $p = 0.306$ ; EAC:  $M = 3.54$ ,  $CI = [2.42, 4.61]$ ,  $p < 0.001$ ). Given that some of these regions are involved  
 174 in higher-order processing, at least in adults, these findings suggest that infant event segmentation is not  
 175 entirely sensory-driven.

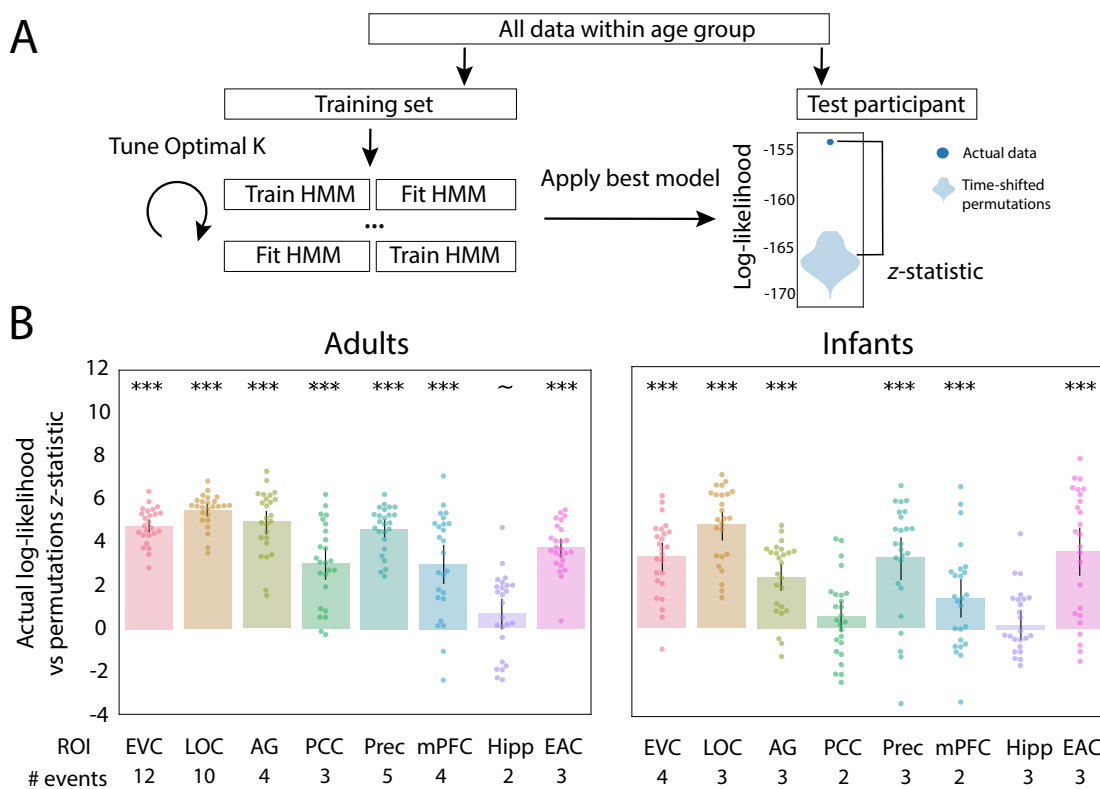

176

**Figure 3.** The nested cross-validation analysis of adult and infant age groups. (A) Schematic explaining the nested cross-validation procedure for computing the reliability of event segmentation. (B) Results of ROI analyses for adults and infants. There is reliable event structure, operationalized as better model fit in actual vs. permuted held-out data, in both adults and infants across ROIs. The number of events that optimized model log-likelihood in the full sample of participants is labeled below the x-axis. Dots represent individual participants and error bars represent 95% CIs of the mean from bootstrap resampling. \*\*\*  $p < 0.001$ , \*\*  $p < 0.01$ , \*  $p < 0.05$ , ~  $p < 0.1$ .

177

### 178 Relationship between adult and infant event structure

179

The optimal number of events for a given region differs across adults and infants, but this does not necessarily mean that the patterns of neural activity are unrelated. For instance, the coarser event structure in infants may still be present in the adult brain, with their additional events carving up these longer events at a finer scale. Conversely, the finer event structure found in adults may still be developing in the infant brain, such that it may be present but have less optimal fit. We thus investigated whether event structure from one group could explain the neural activity of individual participants in the other group (Figure 4). We compared this to the extent that other members of the same group could explain an individual's neural activity. If event structure better explains neural data from the same age group compared to the other age group, then we can conclude that event structures differ between age groups.

186

When event segmentation models fit to adults were applied to infant neural activity, all ROIs except hippocampus showed significant model fit over permutations (EVC:  $M = 3.79$ ,  $CI = [3.36, 4.20]$ ,  $p < 0.001$ ;  
 189 LOC:  $M = 4.64$ ,  $CI = [4.13, 5.12]$ ,  $p < 0.001$ ; AG:  $M = 2.82$ ,  $CI = [2.23, 3.33]$ ,  $p < 0.001$ ; PCC:  $M = 1.55$ ,  $CI =$   
 190



191 [0.896, 2.23],  $p < 0.001$ ; precuneus:  $M = 3.54$ ,  $CI = [2.90, 4.19]$ ,  $p < 0.001$ ; mPFC:  $M = 3.07$ ,  $CI = [2.43, 3.75]$ ,  $p$   
 192  $< 0.001$ ; hippocampus:  $M = 0.185$ ,  $CI = [-0.619, 0.967]$ ,  $p = 0.337$ ; EAC:  $M = 2.66$ ,  $CI = [1.69, 3.63]$ ,  $p < 0.001$ .  
 193 This suggests that although infants and adults had a different optimal number of events in these regions,  
 194 there was some overlap in their event representations. In most of these regions, models trained on adults  
 195 showed significantly better fit to adults compared to infants, (EVC:  $M = 1.00$ ,  $CI = [0.478, 1.55]$ ,  $p < 0.001$ ; LOC:  
 196  $M = 0.873$ ,  $CI = [0.325, 1.47]$ ,  $p < 0.001$ ; AG:  $M = 2.16$ ,  $CI = [1.38, 2.96]$ ,  $p < 0.001$ ; PCC:  $M = 1.50$ ,  $CI = [0.506,$   
 197  $2.39]$ ,  $p = 0.002$ ; precuneus:  $M = 1.10$ ,  $CI = [0.385, 1.87]$ ,  $p < 0.001$ ; EAC:  $M = 1.12$ ,  $CI = [0.086, 2.18]$ ,  $p = 0.036$ ),  
 198 suggesting that adult-like event structure is still developing in these regions. Indeed, how well adult event  
 199 structure fit an infant was related to their age, at least in LOC ( $r = 0.472$ ,  $p = 0.018$ ). No other ROIs showed  
 200 a relationship with age, although our relatively small sample for evaluating individual differences and our  
 201 truncated age range may have limited our ability to discover age effects.

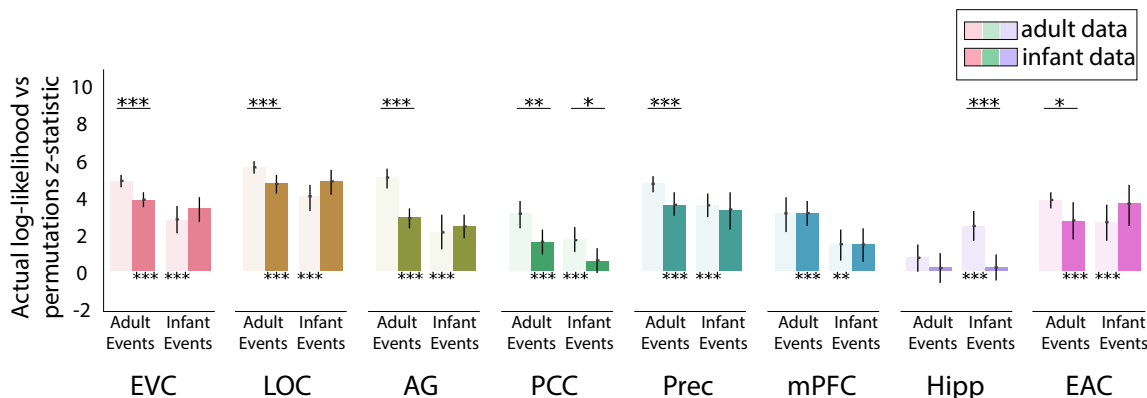

202

**Figure 4.** Reliability of event structure for models fit with participants of the same vs. other age group. (A) Light bars indicate fit of adult and infant event structures to adult data, and dark bars indicate fit of adult and infant event structures to infant data. Note that the fit of event structures to data from the same group (adult events in adults, infant events in infant) are replotted from Figure 3 without statistics. Overall, event structures learned from adults and infants fit data from the other group (clearest in EVC, LOC, AG, PCC, Prec, mPFC, EAC). However, in several regions using adult event structure, these fits were weaker than to data from the same group (clearest in EVC, LOC, AG, PCC). Error bars represent 95% CIs of the mean from bootstrap resampling. \*\*\*  $p < 0.001$ , \*\*  $p < 0.01$ , \*  $p < 0.05$ ,  $\sim p < 0.1$ .

203

204 When event segmentation models fit to infants were applied to adult neural activity, all ROIs showed  
 205 significant model fit over permutations (EVC:  $M = 2.73$ ,  $CI = [2.03, 3.44]$ ,  $p < 0.001$ ; LOC:  $M = 3.95$ ,  $CI = [3.21,$   
 206  $4.62]$ ,  $p < 0.001$ ; AG:  $M = 2.06$ ,  $CI = [1.15, 2.98]$ ,  $p < 0.001$ ; PCC:  $M = 1.65$ ,  $CI = [1.01, 2.34]$ ,  $p < 0.001$ ; precuneus:  
 207  $M = 3.49$ ,  $CI = [2.85, 4.11]$ ,  $p < 0.001$ ; mPFC:  $M = 1.41$ ,  $CI = [0.548, 2.19]$ ,  $p = 0.001$ ; hippocampus:  $M = 2.41$ ,  $CI$   
 208  $= [1.57, 3.20]$ ,  $p < 0.001$ ; EAC:  $M = 2.59$ ,  $CI = [1.62, 3.55]$ ,  $p < 0.001$ ). Infant event models did not explain infant  
 209 data better than adult data in any of the regions. Interestingly, infant event models showed significantly  
 210 better fit to *adult* vs. infant neural activity in PCC ( $M = -1.10$ ,  $CI = [-2.11, -0.184]$ ,  $p = 0.020$ ) and hippocampus  
 211 ( $M = -2.24$ ,  $CI = [-3.28, -1.25]$ ,  $p < 0.001$ ), potentially due to higher across-subject reliability among the adults.  
 212 That is, if infant data are noisier than adult data, but otherwise both groups have similar event structure, the  
 213 model may fit better to a held-out adult. Altogether, the finding that events from one age group significantly  
 214 fit data from the other age group shows that infant and adult event representations, though optimized to  
 215 different event numbers, are not unrelated. Nonetheless, the better fit in some ROIs when applying events  
 216 from one age group to neural activity from the same vs. other age group provides evidence that their event  
 217 structures are at least partially distinct.

## 218 Expression of behavioral event boundaries

219 We took a data-driven approach to discovering event representations across different regions of the adult  
 220 and infant brain, but how do these neural event representations relate to what we report behaviorally?  
 221 In adults, event boundaries in regions such as the AG, precuneus, and PCC align best with annotations of  
 222 high-level scene changes in a movie (Baldassano et al., 2017). Given that our previous analysis found that

223 adult event boundaries in these narrative regions significantly fit infant neural activity, we tested whether  
224 behavioral boundaries from adults were also reflected in the infant brain.

225 We collected behavioral event segmentation data from 22 independent adult participants who watched  
226 the same movie (Ben-Yakov and Henson, 2018), identifying the most salient boundaries (Figure 5A). Par-  
227 ticipants were not instructed to annotate at any particular timescale, and were simply asked to indicate  
228 when it felt like a new event occurred. We quantified the fit of behavioral boundaries to neural activity by  
229 calculating the difference in pattern similarity between two timepoints within vs. across boundaries, equat-  
230 ing temporal distance. Results were weighted by the number of unique timepoint pairs that made up the  
231 smaller group of correlations (e.g., close to the boundary, there are fewer across event pairs than within  
232 event pairs). A more conservative approach that only considers timepoint pairs within vs. across event  
233 boundaries anchored to the same timepoint yields similar results (Appendix 2 Figure 1). To the extent that  
234 behavioral reports reflected the event boundaries in a region, we expected greater neural similarity for  
235 timepoints within events.

236 We performed this analysis in both whole-brain searchlights and in the previous ROIs. In adults, the  
237 searchlight analysis revealed that occipital pole, superior occipital cortex, and right supramarginal gyrus  
238 exhibited significantly greater pattern similarity within vs. across behavioral event boundaries (Figure 5B).  
239 This generally fits with previous work showing that event representations in visual and semantic regions  
240 are similar to behavioral boundaries (Baldassano et al., 2017). For the ROIs, we found significantly greater  
241 pattern similarity within vs. across behavioral boundaries only in early visual cortex of adults (Figure 5C;  
242 EVC:  $M = 0.014$ ,  $CI = [0.003, 0.024]$ ,  $p = 0.01$ ; LOC:  $M = 0.008$ ,  $CI = [-0.005, 0.023]$ ,  $p = 0.278$ ; AG:  $M = -0.015$ ,  $CI$   
243  $= [-0.036, 0.004]$ ,  $p = 0.122$ ; PCC:  $M = -0.009$ ,  $CI = [-0.031, 0.011]$ ,  $p = 0.394$ ; precuneus:  $M = -0.012$ ,  $CI = [-0.030,$   
244  $0.004]$ ,  $p = 0.170$ ; mPFC:  $M = -0.008$ ,  $CI = [-0.018, 0.001]$ ,  $p = 0.092$ ; hippocampus:  $M = -0.004$ ,  $CI = [-0.012,$   
245  $0.002]$ ,  $p = 0.220$ ; EAC:  $M = -0.004$ ,  $CI = [-0.014, 0.006]$ ,  $p = 0.428$ ). Given that most of the non-significant ROIs  
246 in this analysis showed reliable event segmentation overall (Figure 3B), indicating stable neural patterns  
247 within events, the behavioral event boundaries may have been misaligned. There are several potential  
248 sources of this misalignment, including that both age (Cohen and Baldassano, 2021) and anticipation (Lee  
249 et al., 2021) can shift the locations of event boundaries. Anticipation in particular seems possible for a  
250 child-friendly movie like this, with a slowly evolving and relatively simple plot.

251 In infants, several regions showed greater pattern similarity within vs. across behavioral boundaries in  
252 the searchlight analysis, including visual regions, supramarginal gyrus, and medial and lateral frontal cortex.  
253 This was mirrored in the ROIs, where there were significant results in early visual cortex and PCC (EVC:  $M =$   
254  $0.048$ ,  $CI = [0.019, 0.078]$ ,  $p < 0.001$ ; LOC:  $M = 0.014$ ,  $CI = [-0.019, 0.052]$ ,  $p = 0.468$ ; AG:  $M = 0.032$ ,  $CI = [-0.009,$   
255  $0.083]$ ,  $p = 0.160$ ; PCC:  $M = 0.035$ ,  $CI = [0.003, 0.068]$ ,  $p = 0.032$ ; precuneus:  $M = 0.010$ ,  $CI = [-0.013, 0.038]$ ,  
256  $p = 0.524$ ; mPFC:  $M = 0.008$ ,  $CI = [-0.019, 0.036]$ ,  $p = 0.580$ ; hippocampus:  $M = 0.026$ ,  $CI = [-0.005, 0.068]$ ,  
257  $p = 0.136$ ; EAC:  $M = 0.021$ ,  $CI = [-0.008, 0.058]$ ,  $p = 0.162$ ). Thus, infants can have neural representations  
258 related to how adults explicitly segment a movie, long before they can perform the behavior, understand  
259 task instructions, or even speak. The regions in which this occurred did not always overlap with those from  
260 adults, suggesting functional changes over development in the behavioral relevance of neural signals for  
261 event segmentation.



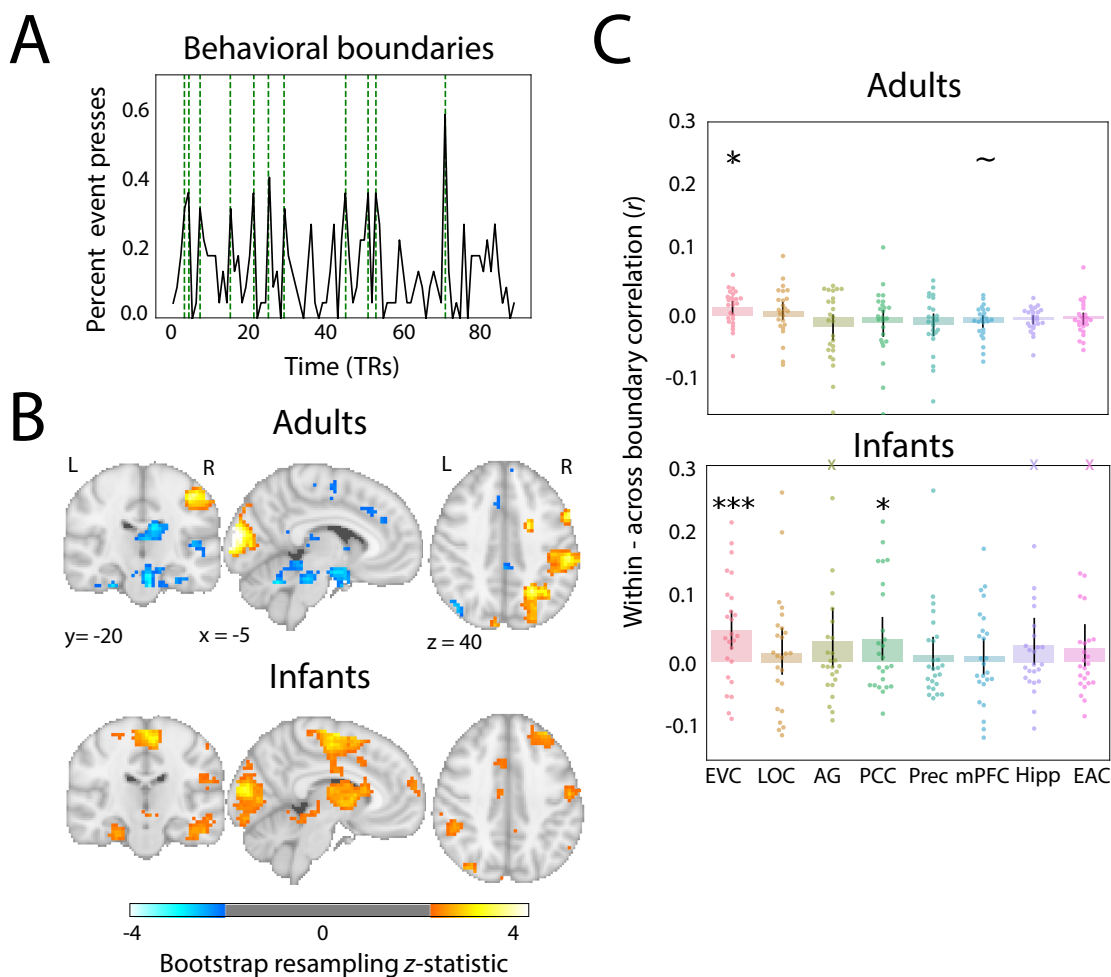

262

**Figure 5.** Relating behavioral boundaries to neural activity. (A) Percentage of behavioral participants who indicated an event boundary was present at each TR in the movie. The 11 TRs with the highest percentage of agreement were used as event boundaries (green dashed lines). (B) Whole-brain searchlight analysis for each age group comparing pattern similarity between timepoints drawn from within vs. across behavioral event boundaries. Bootstrapped z-scores are thresholded at  $p < 0.05$ , uncorrected. (C) ROI analysis of difference in pattern similarity within minus between behavioral events. Dots represent individual participants and error bars represent 95% CIs of the mean from bootstrap resampling. Infant participants with values beyond the y-axis range for AG, hippocampus, and EAC are indicated with Xs at the positive edge. \*\*\*  $p < 0.001$ , \*\*  $p < 0.01$ , \*  $p < 0.05$ , ~  $p < 0.1$ .

263

### 264 **Replicating results in a more heterogeneous cohort**

265 We applied the same suite of analyses to a more heterogeneous convenience sample of infants watching a  
 266 different, short cartoon movie (“Mickey”). In 15 adults, we found a similar topography of ISC as in the main  
 267 cohort, with significant values in EVC, LOC, AG, PCC, precuneus, and EAC (Appendix 3 Figure 1). There was  
 268 again a gradient of event timescales across the cortex, with more events in sensory regions and fewer events  
 269 in narrative regions (Appendix 3 Figure 2). In all but mPFC and hippocampus, event structure significantly  
 270 explained held-out adult data. The 15 infants showed weaker ISC, though still significant in EVC and LOC.  
 271 Weaker ISC may potentially be related to the broader age range of the infants (4–33 months) – almost  
 272 two additional years – given the dramatic developmental changes that occur in this age range and the  
 273 reliance of ISC on common signal across participants. There was again no evidence of a hierarchical gradient  
 274 in the number/granularity of events in the infant brain (Appendix 3 Figure 2). The model again favored  
 275 fewer/coarser events across regions, yet these events reliably fit neural activity from a held-out participant in  
 276 EVC, LOC, precuneus, mPFC, and hippocampus (Appendix 3 Figure 2). In sum, we obtained results consistent

277 with those of the main cohort, despite the movie being shorter and the age of infants being much more  
278 variable.

## 279 Discussion

280 In this study, we investigated neural event segmentation using a data-driven, computational approach in  
281 adults and infants watching the same short movie. We found synchronous processing of the movie and reli-  
282 able event structure in both groups. In adults, we replicated a previously observed gradient of timescales in  
283 event processing across brain regions. However, this gradient was absent in infants, who instead had coarse  
284 neural event structure across regions. We replicated this pattern in a separate, more heterogeneous set  
285 of infants watching a different movie. Although event structure from one age group provided a reliable fit  
286 to the other age group, suggesting some similarity in their representations, adult event structure best fit  
287 adult data, suggesting developmental differences. Furthermore, whereas behavioral boundaries aligned  
288 with event structure in early visual regions in adults, they were more broadly aligned in infants, including in  
289 posterior cingulate cortex. Altogether, this study provides novel insights into how infants represent contin-  
290 uous experience, namely that they segment experience into discrete events, as in adults, but at a coarser  
291 granularity.

292 Traditionally, findings of cognitive and neural development have focused on the earlier maturation of  
293 sensorimotor systems, followed by the later development of associative regions (Casey et al., 2005). If as-  
294 sociative regions are still developing, infant event segmentation may be sensory-driven. However, ISC and  
295 event structure in infants was not limited to visual regions, extending into regions linked to narrative pro-  
296 cessing in adults (Lee et al., 2020). Furthermore, infants structured events over a longer timescale, consis-  
297 tent with their ability to represent more extended, complex content. Indeed, the event structure in several  
298 infant regions including the posterior cingulate cortex resembled event boundaries that adults reported  
299 explicitly in behavior. We found general similarity between event representations in high-level regions of  
300 adults and infants, which can perhaps be understood in light of the sensitivity of infants to goal-directed ac-  
301 tions and events (Levine et al., 2019). Young infants both predict the outcomes of actions (Woodward, 1998)  
302 and are surprised by inefficient paths towards a goal (Liu et al., 2019) when a causal agent is involved. Unam-  
303 biguous agency also increases the ability of older infants to learn statistical structure (Monroy et al., 2017),  
304 suggesting that the infant mind may prioritize agency. Indeed, infants are better at imitating a sequence of  
305 actions that have hierarchical versus arbitrary structure (Bauer and Mandler, 1989; Bauer, 1992) and show  
306 better memory for events that have a clear agent (Howard and Woodward, 2019), perhaps because of a  
307 propensity to segment events according to goals during encoding. Together, these results provide reason  
308 to believe that infants can represent high-level event structure from early ages.

309 In both of the infant movie-watching datasets, the optimal number of events in visual regions was lower  
310 in infants than adults. We interpret this result as reflecting the development of temporal receptive window  
311 lengths. Indeed, young children bind multi-sensory and uni-modal visual information over longer windows  
312 (Lewkowicz, 1996; Lewkowicz and Flom, 2014; Farzin et al., 2011; Freschl et al., 2021). Interestingly, dimin-  
313 ished temporal resolution may be advantageous to infants when gathering information about objects and  
314 events in their environment (Freschl et al., 2019). For instance, infants may better extract meaning from  
315 social interactions if they can bind together continuously unfolding visual, auditory, and emotional infor-  
316 mation; accordingly, toddlers with autism spectrum disorder have shorter than normal temporal receptive  
317 windows (Freschl et al., 2021). This behavioral literature has been agnostic to how or why temporal recep-  
318 tive windows are dilated in infancy, but perhaps the lack of neural gradient contributes to the binding of  
319 information over longer time scales. Future work combining behavioral and neural approaches to temporal  
320 processing could inform this relationship. One alternative explanation for the smaller number of events in  
321 visual regions could be model bias, for example if the model defaults to fewer events in heterogeneous  
322 participant groups. Although the Aeronaut dataset had a narrower age band (all participants were under  
323 12 months old), there are still dramatic cognitive and neural changes during the first year of life (Turesky  
324 et al., 2021). We found some evidence of developmental differences in how well adult event structure fit  
325 infant LOC, but no other regions showed age-dependent changes. Furthermore, we found *overestimation*

326 in the number of events when noise was increased in simulations. This is inconsistent with attributing the  
327 fewer and longer events observed in infants to their greater functional and anatomical variability.

328 The nature of conducting fMRI research in awake infants means our study has several important limi-  
329 tations. First, there was more missing data in the infant age groups from eye closure and eye movements.  
330 We partially addressed this issue by introducing a new variance parameter to the computational model, but  
331 acknowledge that it remains an unavoidable quirk in the datasets. Second, our analyses were conducted  
332 in a common adult standard space, requiring alignment across participants. Because of uncertainty in the  
333 localization and extent of these regions in infants, we defined our a priori ROIs liberally. This may explain  
334 the curious finding of reliable event structure in EAC for both adults and infants. Indeed, the EAC ROI en-  
335 compassed secondary auditory regions and superior temporal gyrus, which is important for social cognition  
336 (Jacoby et al., 2016) and motion and face processing (Hein and Knight, 2008). Future work could define ROIs  
337 based on a child atlas (Oishi et al., 2019), although that would complicate comparison to adults. Alternatively,  
338 ROIs could be defined in each individual using a functional localizer task, though collecting both movie and  
339 localizer data from a single infant session is difficult. Nonetheless, in other work, we have successfully used  
340 adult-defined ROIs to investigate infant visual processing (Ellis et al., 2020a) and attentional cuing (Ellis et al.,  
341 2020d).

342 In conclusion, we found that infants segment continuous experience into discrete neural events, but  
343 do so in a coarser way than the corresponding brain regions in adults and without a resulting gradient in  
344 the timescale of event processing across these regions. By using a neural approach to access event repre-  
345 sentations during naturalistic movie-watching from neural activity, we supplement the limited repertoire of  
346 behavioral tasks and measures available in the first year of life, providing a new perspective on the assumed  
347 “blooming, buzzing confusion” (James, 1890) of infant visual experience.

## 348 **Methods and Materials**

### 349 **Participants**

350 Data were collected from 25 infants under one year of age (3.60 – 12.70 months;  $M = 7.43$ ,  $SD = 2.70$ ; 13  
351 female) while they watched a silent cartoon (“Aeronaut”). Infants who moved their head excessively ( $N = 11$ )  
352 or did not look the screen ( $N = 4$ ) during more than half of the movie were excluded. We further excluded  
353 participants for whom we had to stop the scan less than halfway through the movie because of fussiness  
354 or movement ( $N = 9$ ). For comparison, we also collected data from 25 adult participants (18 – 32 years;  $M =$   
355  $22.64$ ,  $SD=3.62$ ; 14 female) who watched the same movie. The study was approved by the Human Subjects  
356 Committee (HSC) at Yale University. All adults provided informed consent, and parents provided informed  
357 consent on behalf of their child.

### 358 **Materials**

359 Aeronaut is a 3-minute long segment of a short film entitled “Soar” created by Alyce Tzue ([https://vimeo.com/](https://vimeo.com/148198462)  
360 [148198462](https://vimeo.com/148198462)). The film was downloaded from YouTube in Fall 2017 and iMovie was used to trim the length.  
361 The audio was not played to participants in the scanner. The movie spanned 45.5 visual degrees in width  
362 and 22.5 visual degrees in height. In the video, a girl is looking at airplane blueprints when a miniature boy  
363 crashes his flying machine onto her workbench. The pilot appears frightened at first, but the girl helps him  
364 fix the machine. After a few failed attempts, a blueprint flies into the girl’s shoes, which they use to finally  
365 launch the flying machine into the air to join a flotilla of other ships drifting away. In the night sky, the pilot  
366 opens his suitcase, revealing a diamond star, and tosses it into the sky. The pilot then looks down at Earth  
367 and signals to the girl, who looks up as the night sky fills with stars.

368 The code used to show the movies on the experimental display is available at [https://github.com/ntblab/](https://github.com/ntblab/experiment_menu/tree/Movies/)  
369 [experiment\\_menu/tree/Movies/](https://github.com/ntblab/experiment_menu/tree/Movies/). The code used to perform the data analyses is available at [https://github.com/](https://github.com/ntblab/infant_neuropipe/tree/EventSeg/)  
370 [ntblab/infant\\_neuropipe/tree/EventSeg/](https://github.com/ntblab/infant_neuropipe/tree/EventSeg/); this code builds on tools from the Brain Imaging Analysis Kit (Kumar  
371 et al. 2020; <https://brainiak.org/docs/>). Raw and preprocessed functional data and anatomical images will be  
372 released publicly.

### 373 **Data acquisition**

374 Procedures and parameters for collecting MRI data from awake infants were developed and validated in  
375 a previous methods paper (Ellis et al., 2020a), with important details repeated below. Data were collected  
376 at the Brain Imaging Center in the Faculty of Arts and Sciences at Yale University. We used a Siemens  
377 Prisma (3T) MRI and the bottom half of the 20-channel head coil. Functional images were acquired with a  
378 whole-brain T2\* gradient-echo EPI sequence (TR = 2s, TE = 30ms, flip angle = 71, matrix = 64x64, slices =  
379 34, resolution = 3mm iso, interleaved slice acquisition). Anatomical images were acquired with a T1 PETRA  
380 sequence for infants (TR1 = 3.32ms, TR2 = 2250ms, TE = 0.07ms, flip angle = 6, matrix = 320x320, slices =  
381 320, resolution = 0.94mm iso, radial slices = 30000) and a T1 MPRAGE sequence for adults (TR = 2300ms, TE  
382 = 2.96ms, TI = 900ms, flip angle = 9, iPAT = 2, slices = 176, matrix = 256x256, resolution = 1.0mm iso). The  
383 adult MPRAGE sequence included the top half of the 20-channel head coil.

### 384 **Procedure**

385 Before their first session, infant participants and their parents met with the researchers for a mock scan-  
386 ning session to familiarize them with the scanning environment. Scans were scheduled for a time when  
387 the infant was thought to be most comfortable and calm. Infants and their accompanying parents were  
388 extensively screened for metal. Three layers of hearing protection (silicon inner ear putty, over-ear adhe-  
389 sive covers, and ear muffs) were applied to the infant participant. They were then placed on the scanner  
390 bed on top of a vacuum pillow that comfortably reduced movement. Stimuli were projected directly on to  
391 the surface of the bore. A video camera (MRC high-resolution camera) was placed above the participant  
392 to record their face during scanning. Adult participants underwent the same procedure with the following  
393 exceptions: they did not attend a mock scanning session, hearing protection was only two layers (earplugs  
394 and optoacoustics noise-canceling headphones), and they were not given a vacuum pillow. Finally, infants  
395 may have participated in additional tasks during their scanning session, whereas adult sessions contained  
396 only the movie task (and an anatomical image).

### 397 **Gaze coding**

398 Gaze was coded offline by 2-3 coders for infants ( $M = 2.08$ ,  $SD = 0.74$ ) and by 1 coder for adults. Based on  
399 recordings from the in-bore camera, coders determined whether the participant's eyes were on-screen, off-  
400 screen (i.e., blinking or looking away), or undetected (i.e., out of the camera's field of view). In two infants,  
401 gaze data were not collected because of technical issues; in both cases, infants were monitored by visual  
402 inspection of a researcher and determined to be attentive enough to warrant inclusion. For all other infants,  
403 coders were highly reliable: They reported the same response code on an average of 93.2% ( $SD = 5.17\%$ ;  
404 range across participants = 77.7–99.6%) of frames. The modal response across coders from a moving win-  
405 drow of five frames was used to determine the final response for the frame centered in that window. In the  
406 case of ties, the response from the previous frame was used. Frames were pooled within TRs, and the aver-  
407 age proportion of TRs included was high for both adults ( $M = 98.8\%$ ,  $SD = 3.17\%$ ; range across participants  
408 = 84.4–100%) and infants ( $M = 88.4\%$ ,  $SD = 12.1\%$ ; range across participants = 56.0–100%).

### 409 **Preprocessing**

410 Data from both age groups were preprocessed using a modified FSL FEAT pipeline designed for infant fMRI  
411 (Ellis et al., 2020a). If infants participated in other tasks during the same functional run, the movie data was  
412 cleaved to create a pseudorun ( $N = 12$ ). Three burn-in volumes were discarded from the beginning of each  
413 run/pseudorun. Motion correction was applied using the centroid volume as the reference – determined  
414 by calculating the Euclidean distance between all volumes and choosing the volume that minimized the  
415 distance to all other volumes. Slices in each volume were realigned using slice-timing correction. Timepoints  
416 with greater than 3mm of translational motion were excluded and temporally interpolated so as not to  
417 bias linear detrending. The vast majority of infant timepoints were included after motion exclusion ( $M =$   
418  $92.8\%$ ,  $SD = 9.8$ ; range across participants = 65.6–100%) and all adult timepoints were included (100% for all  
419 participants). These timepoints and timepoints during which eyes were closed for a majority of the volume  
420 were then excluded from subsequent analyses. The signal-to-fluctuating-noise ratio (SFNR) was calculated

421 (Friedman and Glover, 2006) and thresholded to form the mask of brain vs non-brain voxels. Data were  
422 spatially smoothed with a Gaussian kernel (5mm FWHM) and linearly detrended in time. AFNI's despiking  
423 algorithm was used to attenuate aberrant timepoints within voxels. After removing excess burn-out TRs,  
424 functional data were z-scored within run.

425 The centroid functional volume was registered to the anatomical image. Initial alignment was performed  
426 using FLIRT with a normalized mutual information cost function. This automatic registration was manually  
427 inspected and then corrected if necessary using mrAlign from mrTools (Gardener lab). To compare across  
428 participants, functional data were further transformed into standard space. For infants, anatomical images  
429 were first aligned automatically (FLIRT) and then manually (Freeview) to an age-specific MNI infant template  
430 (Fonov et al., 2009). This infant template was then aligned to adult MNI standard (MNI152). Adult anatomical  
431 images were directly aligned to the adult MNI standard. For all analyses, we only considered voxels included  
432 in the intersection of all infant and adult brain masks.

433 In an additional exploratory analysis, we re-aligned participants' anatomical data to the adult standard  
434 using ANTs (Avants et al., 2011), a non-linear alignment algorithm. For infants, an initial linear alignment  
435 with 12 DOF was used to align anatomical data to the age-specific infant template, followed by non-linear  
436 warping using diffeomorphic symmetric normalization. Then, as before, we used a predefined transforma-  
437 tion (12 DOF) to linearly align between the infant template and adult standard. For adults, we used the  
438 same alignment procedure, except participants were directly aligned to adult standard. Results using this  
439 non-linear procedure were nearly identical to the original analyses (Appendix 4 Figure 1).

#### 440 **Regions of interest**

441 We performed analyses over the whole brain and in regions of interest (ROIs). We defined the ROIs using  
442 the Harvard-Oxford probabilistic atlas (0% probability threshold; Jenkinson et al. 2012) in early visual cor-  
443 tex (EVC), lateral occipital cortex (LOC), angular gyrus (AG), precuneus, early auditory cortex (EAC), and the  
444 hippocampus. We used functionally defined parcellations obtained in resting state (Shirer et al., 2012) to  
445 define two additional ROIs: medial prefrontal cortex (mPFC) and posterior cingulate cortex (PCC). We in-  
446 cluded these regions because of their involvement in narrative perception, event processing, and longer  
447 time-scales of integration (Hasson et al., 2015).

#### 448 **Intersubject correlation**

449 We assessed whether participants were processing the movie in a similar way using intersubject correla-  
450 tion (ISC; Hasson et al. 2004; Nastase et al. 2019). For each voxel, we correlated the timecourse of activ-  
451 ity between a single held-out participant and the average timecourse of all other participants in a given  
452 age group. We iterated through each participant and then created the average ISC map by first Fisher-  
453 transforming the Pearson correlations, averaging these transformed values, and then performing an in-  
454 verse Fisher-transformation on the average. We visualize the whole-brain map of the intersubject correla-  
455 tions for adults and infants separately, thresholded at a correlation of 0.10.

456 For the ROI analysis, the voxel ISCs within a region were averaged separately for each held-out par-  
457 ticipant using the Fisher-transform method described above. Statistical significance was determined by  
458 bootstrap resampling. We randomly sampled participants with replacement 1,000 times, on each iteration  
459 forming a new sample of the same size as the original group, then averaged their ISC values to form a  
460 sampling distribution. The  $p$ -value was calculated as the proportion of resampling iterations on which the  
461 group average had the opposite sign as the original effect, doubled to make it two-tailed. For comparing  
462 ISC across infant and adult groups, we permuted the age group labels 1,000 times, each time recalculating  
463 ISC values for these shuffled groups and then finding the difference of group means. This created a null  
464 distribution for the difference between age groups.

#### 465 **Event segmentation model**

466 To determine the characteristic patterns of event states and their structure, we applied a Hidden Markov  
467 Model (HMM) variant (Baldassano et al., 2017) available in BrainIAK (Kumar et al., 2020) to the average fMRI  
468 activity of participants from the same age group. This model uses an algorithm that alternates between



469 estimating two related components of stable neural events: (1) multivariate event patterns and (2) their  
470 event structure (i.e., placement of boundaries between events). The constraints of the model are that each  
471 event state is only visited once, and that staying versus transitioning into a new event state have the same  
472 prior probability. Model fitting stopped when the log probability that the data were generated from the  
473 learned event structure (i.e., log-likelihood; Etz 2018) began to decrease.

474 To deal with missing data in the input (a reality of infant fMRI data), we modified the BrainIAK implemen-  
475 tation of the HMM. First, in calculating the probability that each observed timepoint was generated from  
476 each possible event model, timepoint variance was scaled by the proportion of participants with data at  
477 that timepoint. In other words, if some infants had missing data at a timepoint because of head motion  
478 or gaze, the variance at that timepoint was adjusted by the square-root of the maximum number of par-  
479 ticipants divided by the square-root of the number of participants with data at that point. This meant that  
480 even though the model was fit on averaged data that obscured missing timepoints, it had an estimate of  
481 the “trustworthiness” of each timepoint. Second, for the case in which missing timepoints persisted after  
482 averaging across participants, the log-probability for the missing timepoint was linearly interpolated based  
483 on nearby values.

484 The HMM requires a hyperparameter indicating the number of event states. By testing a range of event  
485 numbers and assessing model fit, we can determine the optimal number of events for a given voxel or  
486 region. We used a cubical searchlight (7x7x7 voxels) to look at the timescales of event segmentation across  
487 the whole brain. In a given searchlight, the HMM was fit to the average timecourse of activity for a random  
488 split half of participants using a range of event counts between 2 and 21. We capped the maximum number  
489 of possible events at 21 to ensure that at least some events would be several TRs long. The learned event  
490 patterns and structure for each event count were then applied to the average time course of activity for  
491 held-out data, and model fit was assessed using the log-likelihood. We iterated through this procedure,  
492 each time splitting the data in half differently. The center voxel of the searchlight was assigned the number  
493 of events that maximized the average log-likelihood across 24 iterations (chosen to be approximately the  
494 same number of iterations as a leave-one-participant-out analysis). This analysis was performed in each  
495 searchlight, separately for adults and infants, to obtain a topography of event timescales. We also used this  
496 method to determine the optimal number of events for each of our ROIs. In these analyses, the timecourse  
497 of activity for every voxel in the ROI was used to learn the event structure.

498 To test whether a given ROI had statistically significant event structure, we used a nested cross-validation  
499 approach. The inner loop of this analysis was identical to what is described above, except that a single partic-  
500 ipant was completely held out from the analysis. After finding the optimal number of events for all but that  
501 held-out participant, the event patterns and structure were fit to that participant’s data. The log-likelihood  
502 for those data was compared to a permuted distribution, where the participant’s data was time-shifted for  
503 every possible shift value between one and the length of the movie. We calculated a z-statistic as the differ-  
504 ence between the actual log-likelihood and the average log-likelihood of the permuted distribution, divided  
505 by the standard deviation of the permuted distribution. We then iterated through all participants and used  
506 bootstrap resampling of the z-statistics to determine significance. We randomly sampled participants with  
507 replacement 1,000 times, on each iteration forming a new sample of the same size as the original group,  
508 then averaged their z-statistics to form a sampling distribution. The *p*-value was calculated as the proportion  
509 of resampling iterations with values less than zero, doubled to make it two-tailed.

## 510 Behavioral segmentation

511 Behavioral segmentation was collected from 22 naive undergraduate students attending Yale University  
512 (18 – 22 years;  $M = 18.86$ ,  $SD=0.97$ ; 14 female) All participants provided informed consent and received for  
513 course credit. Participants were instructed to attend to the Aeronaut movie and press a key on the keyboard  
514 to indicate whenever a new, meaningful event occurred. Participants watched a version of the movie with  
515 its accompanying audio – a musical track without language. While the visual input remained the same as the  
516 fMRI data collection, these auditory cues may have influenced event segmentation (Cutting, 2019). During  
517 data collection, participants also evaluated nine other movies, not described here, and verbally recalled each  
518 movie after segmenting. We elected to have participants use their own judgement for what constituted an



519 event change. Participants had a 1-minute practice movie to orient them to the task, and the Aeronaut  
520 movie appeared in a random order among the list of other movies. To capture “true” event boundaries and  
521 avoid contamination by accidental or delayed key presses, we followed a previously published procedure  
522 (Ben-Yakov and Henson, 2018). That is, we set a threshold for the number of participants who indicated  
523 the same event boundary, such that the number of event boundaries agreed upon by at least that many  
524 participants was equal or close to the average number of key presses across participants. We found 11  
525 event boundaries (12 events) that were agreed upon by 32% of participants (for reference, ~31% was used  
526 in Ben-Yakov and Henson 2018).

527 To evaluate whether these behavioral boundaries predicted neural data, we tested whether voxel activ-  
528 ity patterns for timepoints within a boundary were more correlated than timepoints spanning a boundary.  
529 This within-vs-across boundary comparison has been used previously as a metric of event structure (Bal-  
530 dassano et al., 2017). For our analysis, we considered all possible pairs of timepoints within and across  
531 boundaries. For each temporal distance from the boundary, we subtracted the average correlation value  
532 for pairs of timepoints that were across events from the average correlation value for pairs of timepoints  
533 within the same event. At different temporal distances, there are either more or less within-event pairs  
534 compared to across-event pairs. To equate the number of within and across event pairs, we subsampled  
535 values and recomputed the within vs. across difference score 1,000 times. To combine across distances  
536 that had different numbers of possible pairs, we weighted the average difference score for each distance  
537 by the number of unique timepoint pairs that made up the smaller group of timepoint pairs (i.e., across-  
538 event pairs when temporal distance was low, within-event pairs when temporal distance was high). This  
539 was repeated for all participants, resulting in a single weighted within vs. across difference score for each  
540 participant. For the ROIs, we used bootstrap resampling of these participant difference scores to determine  
541 statistical significance. The  $p$ -value was the proportion of difference values that were less than zero after  
542 1,000 resamples, doubled to make it two-tailed. For the whole-brain searchlight results, we also used 1,000  
543 bootstrap resamples to determine statistical significance for within-vs-across difference scores for each  
544 voxel. We then calculated a  $z$ -score for each voxel as the the distance between the bootstrap distribution  
545 and zero, and thresholded the bootstrapped  $z$ -score map at  $p < 0.05$ , uncorrected.

## 546 **Acknowledgments**

547 We are thankful to the families of infants who participated. We also acknowledge the hard work of the Yale  
548 Baby School team, including L. Rait, J. Daniels, and K. Armstrong for recruitment, scheduling, and adminis-  
549 tration. Thank you to J. Wu, J. Fel, and A. Klein for help with gaze coding and to R. Watts for technical support.  
550 We are grateful for internal funding from the Department of Psychology and Faculty of Arts and Sciences at  
551 Yale University. N.B.T-B. was further supported by the Canadian Institute for Advanced Research and the  
552 James S. McDonnell Foundation (<https://doi.org/10.37717/2020-1208>).

## 553 **Author contributions**

554 T.S.Y: Conceptualization, Software, Data collection, Formal analysis, Writing - original draft, Writing - review  
555 and editing. L.J.S.: Data collection, Writing - review and editing. C.T.E.: Conceptualization, Data collection,  
556 Writing - original draft, Writing - review and editing. A.J.B.: Data collection, Writing - review and editing. C.B.:  
557 Methodology, Software, Writing - review and editing. N.B.T-B.: Conceptualization, Data collection, Writing -  
558 original draft, Writing - review and editing, Supervision, Funding acquisition.

## References

- 559  
560 **Aslin RN.** What's in a look? *Developmental Science*. 2007; 10(1):48–53. <https://onlinelibrary.wiley.com/doi/abs/10.1111/j.1467-7687.2007.00563.x>, doi: 10.1111/j.1467-7687.2007.00563.x.
- 562 **Avants BB,** Tustison NJ, Song G, Cook PA, Klein A, Gee JC. A reproducible evaluation of ANTs similarity metric performance  
563 in brain image registration. *Neuroimage*. 2011; 54(3):2033–2044.
- 564 **Bailey HR,** Kurby CA, Sargent JQ, Zacks JM. Attentional focus affects how events are segmented and updated in narrative  
565 reading. *Memory & Cognition*. 2017; 45(6):940–955. <https://doi.org/10.3758/s13421-017-0707-2>, doi: 10.3758/s13421-017-0707-2.
- 567 **Baillargeon R,** Scott RM, Bian L. Psychological Reasoning in Infancy. *Annual Review of Psychology*. 2016; 67(1):159–186.  
568 <https://doi.org/10.1146/annurev-psych-010213-115033>, doi: 10.1146/annurev-psych-010213-115033.
- 569 **Baldassano C,** Chen J, Zadbood A, Pillow JW, Hasson U, Norman KA. Discovering event structure in continuous narrative  
570 perception and memory. *Neuron*. 2017; 95(3):709–721.e5. <https://www.ncbi.nlm.nih.gov/pmc/articles/PMC5558154/>,  
571 doi: 10.1016/j.neuron.2017.06.041.
- 572 **Baldassano C,** Hasson U, Norman KA. Representation of Real-World Event Schemas during Narrative Percep-  
573 tion. *The Journal of Neuroscience*. 2018; 38(45):9689. <http://www.jneurosci.org/content/38/45/9689.abstract>, doi:  
574 10.1523/JNEUROSCI.0251-18.2018.
- 575 **Baldwin DA,** Baird JA, Saylor MM, Clark MA. Infants Parse Dynamic Action. *Child Development*. 2001; 72(3):708–717.  
576 <https://srcd.onlinelibrary.wiley.com/doi/abs/10.1111/1467-8624.00310>, doi: <https://doi.org/10.1111/1467-8624.00310>.
- 577 **Bauer PJ.** Holding it all together: How enabling relations facilitate young children's event recall. *Cognitive Development*.  
578 1992; 7(1):1–28. <http://www.sciencedirect.com/science/article/pii/0885201492900029>, doi: 10.1016/0885-2014(92)90002-9.  
579 9.
- 580 **Bauer PJ,** Mandler JM. One thing follows another: Effects of temporal structure on 1- to 2-year-olds' recall of events.  
581 *Developmental Psychology*. 1989; 25(2):197–206. doi: 10.1037/0012-1649.25.2.197.
- 582 **Ben-Yakov A,** Henson RN. The Hippocampal Film Editor: Sensitivity and Specificity to Event Boundaries in Continuous  
583 Experience. *Journal of Neuroscience*. 2018; 38(47):10057–10068. <https://www.jneurosci.org/content/38/47/10057>, doi:  
584 10.1523/JNEUROSCI.0524-18.2018.
- 585 **Biagi L,** Crespi SA, Tosetti M, Morrone MC. BOLD Response Selective to Flow-Motion in Very Young Infants. *PLOS Biology*.  
586 2015; 13(9):e1002260. <https://journals.plos.org/plosbiology/article?id=10.1371/journal.pbio.1002260>, doi: 10.1371/jour-  
587 nal.pbio.1002260.
- 588 **Casey B,** Tottenham N, Liston C, Durston S. Imaging the developing brain: what have we learned about cognitive develop-  
589 ment? *Trends in Cognitive Sciences*. 2005; 9(3):104–110. <https://linkinghub.elsevier.com/retrieve/pii/S1364661305000306>,  
590 doi: 10.1016/j.tics.2005.01.011.
- 591 **Chen J,** Leong YC, Honey CJ, Yong CH, Norman KA, Hasson U. Shared memories reveal shared structure in neural ac-  
592 tivity across individuals. *Nature Neuroscience*. 2017; 20(1):115–125. <https://www.nature.com/articles/nn.4450>, doi:  
593 10.1038/nn.4450.
- 594 **Clewett D,** DuBrow S, Davachi L. Transcending time in the brain: How event memories are constructed from  
595 experience. *Hippocampus*. 2019; 29(3):162–183. <https://onlinelibrary.wiley.com/doi/abs/10.1002/hipo.23074>, doi:  
596 <https://doi.org/10.1002/hipo.23074>.
- 597 **Cohen SS,** Baldassano C. Developmental changes in story-evoked responses in the neocortex and hippo-  
598 campus. *bioRxiv*. 2021; p. 2021.04.12.439526. <https://www.biorxiv.org/content/10.1101/2021.04.12.439526v2>, doi:  
599 10.1101/2021.04.12.439526.
- 600 **Cutting JE.** Sequences in popular cinema generate inconsistent event segmentation. *Attention, Perception, & Psy-*  
601 *chophysics*. 2019; 81(6):2014–2025. <https://doi.org/10.3758/s13414-019-01757-w>, doi: 10.3758/s13414-019-01757-w.
- 602 **Deen B,** Richardson H, Dilks DD, Takahashi A, Keil B, Wald LL, Kanwisher N, Saxe R. Organization of high-level visual  
603 cortex in human infants. *Nature Communications*. 2017; 8(1):13995. <https://www.nature.com/articles/ncomms13995>,  
604 doi: 10.1038/ncomms13995.
- 605 **Dehaene-Lambertz G.** Functional Neuroimaging of Speech Perception in Infants. *Science*. 2002; 298(5600):2013–2015.  
606 <https://www.sciencemag.org/lookup/doi/10.1126/science.1077066>, doi: 10.1126/science.1077066.

- 607 **Ellis CT**, Skalaban LJ, Yates TS, Bejjanki VR, Córdova NI, Turk-Browne NB. Re-imagining fMRI for awake behaving infants.  
608 Nature Communications. 2020; 11(1):4523. <https://www.nature.com/articles/s41467-020-18286-y>, doi: 10.1038/s41467-  
609 020-18286-y.
- 610 **Ellis CT**, Yates TS, Skalaban LJ, Bejjanki VR, Arcaro MJ, Turk-Browne NB. Retinotopic organization of visual cortex in  
611 human infants. bioRxiv. 2020; p. 2020.12.01.407437. <https://www.biorxiv.org/content/10.1101/2020.12.01.407437v1>,  
612 doi: 10.1101/2020.12.01.407437.
- 613 **Ellis CT**, Baldassano C, Schapiro AC, Cai MB, Cohen JD. Facilitating open-science with realistic fMRI simulation: validation  
614 and application. PeerJ. 2020; 8. <https://www.ncbi.nlm.nih.gov/pmc/articles/PMC7035870/>, doi: 10.7717/peerj.8564.
- 615 **Ellis CT**, Skalaban LJ, Yates TS, Turk-Browne NB. Attention recruits frontal cortex in human infants. bioRxiv. 2020; p.  
616 10.1101/2020.10.14.340216. <https://www.biorxiv.org/content/10.1101/2020.10.14.340216v1>.
- 617 **Etz A**. Introduction to the Concept of Likelihood and Its Applications. Advances in Methods and Practices in Psychological  
618 Science. 2018; 1(1):60–69. <https://doi.org/10.1177/2515245917744314>, doi: 10.1177/2515245917744314.
- 619 **Farzin F**, Rivera SM, Whitney D. Time Crawls: The Temporal Resolution of Infants' Visual Attention. Psychological Science.  
620 2011; <https://journals.sagepub.com/doi/10.1177/0956797611413291>, doi: 10.1177/0956797611413291.
- 621 **Fonov VS**, Evans AC, McKinsty RC, Alml C, Collins D. Unbiased nonlinear average age-appropriate brain templates from  
622 birth to adulthood. NeuroImage. 2009; 47:S102.
- 623 **Franchak JM**, Heeger DJ, Hasson U, Adolph KE. Free Viewing Gaze Behavior in Infants and Adults. Infancy. 2016; 21(3):262–  
624 287. <https://onlinelibrary.wiley.com/doi/abs/10.1111/infa.12119>, doi: 10.1111/infa.12119.
- 625 **Freschl J**, Melcher D, Carter A, Kaldy Z, Blaser E. Seeing a Page in a Flipbook: Shorter Visual Temporal Integration Windows  
626 in 2-Year-Old Toddlers with Autism Spectrum Disorder. Autism Research. 2021; 14(5):946–958. <https://onlinelibrary.wiley.com/doi/abs/10.1002/aur.2430>, doi: 10.1002/aur.2430.
- 627 **Freschl J**, Melcher D, Kaldy Z, Blaser E. Visual temporal integration windows are adult-like in 5- to 7-year-old children.  
628 Journal of Vision. 2019; 19(7):5–5. <https://jov.arvojournals.org/article.aspx?articleid=2738014>, doi: 10.1167/19.7.5.
- 629 **Friedman L**, Glover GH. Report on a multicenter fMRI quality assurance protocol. Journal of magnetic resonance imaging:  
630 JMRI. 2006; 23(6):827–839. doi: 10.1002/jmri.20583.
- 631 **Geerligs L**, Gerven Mv, Güçlü U. Detecting neural state transitions underlying event segmentation. Neuro-  
632 roimage. 2021; p. 118085. <https://www.sciencedirect.com/science/article/pii/S1053811921003621?via%3Dihub>, doi:  
633 10.1016/j.neuroimage.2021.118085.
- 634 **Ghosh VE**, Gilboa A. What is a memory schema? A historical perspective on current neuroscience literature.  
635 Neuropsychologia. 2014; 53:104–114. <http://www.sciencedirect.com/science/article/pii/S0028393213003990>, doi:  
636 10.1016/j.neuropsychologia.2013.11.010.
- 637 **Hard BM**, Tversky B, Lang DS. Making sense of abstract events: Building event schemas. Memory & Cognition. 2006;  
638 34(6):1221–1235. <https://doi.org/10.3758/BF03193267>, doi: 10.3758/BF03193267.
- 639 **Hasson U**, Chen J, Honey CJ. Hierarchical process memory: memory as an integral component of information process-  
640 ing. Trends in cognitive sciences. 2015; 19(6):304–313. <https://www.ncbi.nlm.nih.gov/pmc/articles/PMC4457571/>, doi:  
641 10.1016/j.tics.2015.04.006.
- 642 **Hasson U**, Nir Y, Levy I, Fuhrmann G, Malach R. Intersubject Synchronization of Cortical Activity During Natural Vi-  
643 sion. Science. 2004; 303(5664):1634–1640. <https://science.sciencemag.org/content/303/5664/1634>, doi: 10.1126/sci-  
644 ence.1089506.
- 645 **Hasson U**, Yang E, Vallines I, Heeger DJ, Rubin N. A Hierarchy of Temporal Receptive Windows in Human Cortex. Journal of  
646 Neuroscience. 2008; 28(10):2539–2550. <https://www.jneurosci.org/content/28/10/2539>, doi: 10.1523/JNEUROSCI.5487-  
647 07.2008.
- 648 **Hein G**, Knight RT. Superior Temporal Sulcus—It's My Area: Or Is It? Journal of Cognitive Neuroscience. 2008; 20(12):2125–  
649 2136. <https://www.mitpressjournals.org/doi/abs/10.1162/jocn.2008.20148>, doi: 10.1162/jocn.2008.20148.
- 650 **Hespos SJ**, Grossman SR, Saylor MM. Infants' ability to parse continuous actions: further evidence. Neural Networks: The  
651 Official Journal of the International Neural Network Society. 2010; 23(8):1026–1032. doi: 10.1016/j.neunet.2010.07.010.
- 652 **Hespos SJ**, Saylor MM, Grossman SR. Infants' ability to parse continuous actions. Developmental Psychology. 2009;  
653 45(2):575–585. doi: 10.1037/a0014145.
- 654

- 655 **Himberger KD**, Chien HY, Honey CJ. Principles of Temporal Processing Across the Cortical Hierarchy. *Neuro-*  
656 *rosience*. 2018; 389:161–174. <http://www.sciencedirect.com/science/article/pii/S0306452218302951>, doi:  
657 10.1016/j.neuroscience.2018.04.030.
- 658 **Howard LH**, Woodward AL. Human Actions Support Infant Memory. *Journal of Cognition and Devel-*  
659 *opment*. 2019; 20(5):772–789. <https://www.tandfonline.com/doi/full/10.1080/15248372.2019.1664549>, doi:  
660 10.1080/15248372.2019.1664549.
- 661 **Jacoby N**, Bruneau E, Koster-Hale J, Saxe R. Localizing Pain Matrix and Theory of Mind networks with both verbal and  
662 non-verbal stimuli. *NeuroImage*. 2016; 126:39–48. <https://www.ncbi.nlm.nih.gov/pmc/articles/PMC4733571/>, doi:  
663 10.1016/j.neuroimage.2015.11.025.
- 664 **James W**. The principles of psychology. Holt and Company; 1890.
- 665 **Jenkinson M**, Beckmann CF, Behrens TEJ, Woolrich MW, Smith SM. FSL. *NeuroImage*. 2012; 62(2):782–790. [http://www.](http://www.sciencedirect.com/science/article/pii/S1053811911010603)  
666 [sciencedirect.com/science/article/pii/S1053811911010603](http://www.sciencedirect.com/science/article/pii/S1053811911010603), doi: 10.1016/j.neuroimage.2011.09.015.
- 667 **Kirkorian HL**, Anderson DR, Keen R. Age Differences in Online Processing of Video: An Eye Movement Study. *Child*  
668 *Development*. 2012; 83(2):497–507. <https://www.ncbi.nlm.nih.gov/pmc/articles/PMC3305831/>, doi: 10.1111/j.1467-  
669 8624.2011.01719.x.
- 670 **Kumar M**, Ellis CT, Lu Q, Zhang H, Capotà M, Willke TL, Ramadge PJ, Turk-Browne NB, Norman KA. BrainIAK tutorials:  
671 User-friendly learning materials for advanced fMRI analysis. *PLOS Computational Biology*. 2020; 16(1):e1007549. [https://](https://journals.plos.org/ploscompbiol/article?id=10.1371/journal.pcbi.1007549)  
672 [journals.plos.org/ploscompbiol/article?id=10.1371/journal.pcbi.1007549](https://journals.plos.org/ploscompbiol/article?id=10.1371/journal.pcbi.1007549), doi: 10.1371/journal.pcbi.1007549.
- 673 **Kurby CA**, Zacks JM. Segmentation in the perception and memory of events. *Trends in Cognitive Sciences*. 2008; 12(2):72–  
674 79. doi: 10.1016/j.tics.2007.11.004.
- 675 **Lee CS**, Aly M, Baldassano C. Anticipation of temporally structured events in the brain. *eLife*. 2021; 10:e64972. [https://](https://doi.org/10.7554/eLife.64972)  
676 [doi.org/10.7554/eLife.64972](https://doi.org/10.7554/eLife.64972), doi: 10.7554/eLife.64972.
- 677 **Lee H**, Bellana B, Chen J. What can narratives tell us about the neural bases of human memory? *Current Opinion*  
678 *in Behavioral Sciences*. 2020; 32:111–119. <https://www.sciencedirect.com/science/article/pii/S2352154620300279>, doi:  
679 10.1016/j.cobeha.2020.02.007.
- 680 **Lerner Y**, Honey CJ, Silbert LJ, Hasson U. Topographic Mapping of a Hierarchy of Temporal Receptive Windows Using a  
681 Narrated Story. *Journal of Neuroscience*. 2011; 31(8):2906–2915. <https://www.jneurosci.org/content/31/8/2906>, doi:  
682 10.1523/JNEUROSCI.3684-10.2011.
- 683 **Levine D**, Buchsbaum D, Hirsh-Pasek K, Golinkoff RM. Finding events in a continuous world: A developmental account.  
684 *Developmental Psychobiology*. 2019; 61(3):376–389. <https://onlinelibrary.wiley.com/doi/abs/10.1002/dev.21804>, doi:  
685 10.1002/dev.21804.
- 686 **Lewkowicz DJ**. Perception of auditory–visual temporal synchrony in human infants. *Journal of Experimental Psychology:*  
687 *Human Perception and Performance*. 1996; 22(5):1094–1106. doi: 10.1037/0096-1523.22.5.1094.
- 688 **Lewkowicz DJ**, Flom R. The Audiovisual Temporal Binding Window Narrows in Early Childhood. *Child*  
689 *Development*. 2014; 85(2):685–694. <https://srcd.onlinelibrary.wiley.com/doi/abs/10.1111/cdev.12142>, doi:  
690 <https://doi.org/10.1111/cdev.12142>.
- 691 **Liu S**, Brooks NB, Spelke ES. Origins of the concepts cause, cost, and goal in prereaching infants. *Proceedings of the*  
692 *National Academy of Sciences*. 2019; 116(36):17747–17752. <https://www.ncbi.nlm.nih.gov/pmc/articles/PMC6731758/>,  
693 doi: 10.1073/pnas.1904410116.
- 694 **Monroy CD**, Gerson SA, Hunnius S. Toddlers' action prediction: Statistical learning of continuous action se-  
695 quences. *Journal of Experimental Child Psychology*. 2017; 157:14–28. [http://www.sciencedirect.com/science/article/pii/](http://www.sciencedirect.com/science/article/pii/S0022096516302983)  
696 [S0022096516302983](http://www.sciencedirect.com/science/article/pii/S0022096516302983), doi: 10.1016/j.jecp.2016.12.004.
- 697 **Nastase SA**, Gazzola V, Hasson U, Keysers C. Measuring shared responses across subjects using intersubject correlation.  
698 *Social Cognitive and Affective Neuroscience*. 2019; 14(6):667–685. [https://academic.oup.com/scan/article/14/6/667/](https://academic.oup.com/scan/article/14/6/667/5489905)  
699 [5489905](https://academic.oup.com/scan/article/14/6/667/5489905), doi: 10.1093/scan/nsz037.
- 700 **Nelson K**, Fivush R. The Development of Autobiographical Memory, Autobiographical Narratives, and Autobiograph-  
701 ical Consciousness. *Psychological Reports*. 2020; 123(1):71–96. <https://doi.org/10.1177/0033294119852574>, doi:  
702 10.1177/0033294119852574.

- 703 **Oishi K**, Chang L, Huang H. Baby brain atlases. *NeuroImage*. 2019; 185:865–880. [http://www.sciencedirect.com/science/](http://www.sciencedirect.com/science/article/pii/S105381191830291X)  
704 [article/pii/S105381191830291X](http://www.sciencedirect.com/science/article/pii/S105381191830291X), doi: 10.1016/j.neuroimage.2018.04.003.
- 705 **Pace A**, Carver LJ, Friend M. Event-related potentials to intact and disrupted actions in children and adults. *Journal of Experimental Child Psychology*. 2013; 116(2):453–470. [http://www.sciencedirect.com/science/article/pii/](http://www.sciencedirect.com/science/article/pii/S0022096512002032)  
706 [S0022096512002032](http://www.sciencedirect.com/science/article/pii/S0022096512002032), doi: 10.1016/j.jecp.2012.10.013.  
707
- 708 **Pace A**, Levine DF, Golinkoff RM, Carver LJ, Hirsh-Pasek K. Keeping the end in mind: Preliminary brain and behavioral  
709 evidence for broad attention to endpoints in pre-linguistic infants. *Infant Behavior and Development*. 2020; 58:101425.  
710 <http://www.sciencedirect.com/science/article/pii/S0163638319301304>, doi: 10.1016/j.infbeh.2020.101425.
- 711 **Reid VM**, Csibra G, Belsky J, Johnson MH. Neural correlates of the perception of goal-directed action in infants.  
712 *Acta Psychologica*. 2007; 124(1):129–138. <http://www.sciencedirect.com/science/article/pii/S0001691806001260>, doi:  
713 10.1016/j.actpsy.2006.09.010.
- 714 **Saylor MM**, Baldwin DA, Baird JA, LaBounty J. Infants' On-line Segmentation of Dynamic Human Action. *Journal of*  
715 *Cognition and Development*. 2007; 8(1):113–128. <https://www.tandfonline.com/doi/abs/10.1080/15248370709336996>,  
716 doi: 10.1080/15248370709336996.
- 717 **Shin YS**, DuBrow S. Structuring Memory Through Inference-Based Event Segmentation. *Topics in Cognitive Science*. 2021;  
718 13(1):106–127. <https://onlinelibrary.wiley.com/doi/abs/10.1111/tops.12505>, doi: 10.1111/tops.12505.
- 719 **Shirer WR**, Ryali S, Rykhlevskaia E, Menon V, Greicius MD. Decoding Subject-Driven Cognitive States with Whole-Brain  
720 Connectivity Patterns. *Cerebral Cortex*. 2012; 22(1):158–165. <https://www.ncbi.nlm.nih.gov/pmc/articles/PMC3236795/>,  
721 doi: 10.1093/cercor/bhr099.
- 722 **Sonne T**, Kingo OS, Krøjgaard P. Occlusions at event boundaries during encoding have a negative effect on infant memory.  
723 *Consciousness and Cognition*. 2016; 41:72–82. <http://www.sciencedirect.com/science/article/pii/S1053810016300186>,  
724 doi: 10.1016/j.concog.2016.02.006.
- 725 **Sonne T**, Kingo OS, Krøjgaard P. Bound to remember: Infants show superior memory for objects presented at event  
726 boundaries. *Scandinavian Journal of Psychology*. 2017; 58(2):107–113. [https://onlinelibrary.wiley.com/doi/abs/10.1111/](https://onlinelibrary.wiley.com/doi/abs/10.1111/sjop.12351)  
727 [sjop.12351](https://onlinelibrary.wiley.com/doi/abs/10.1111/sjop.12351), doi: 10.1111/sjop.12351.
- 728 **Stahl AE**, Romberg AR, Roseberry S, Golinkoff RM, Hirsh-Pasek K. Infants Segment Continuous Events Using Transitional  
729 Probabilities. *Child development*. 2014; 85(5):1821–1826. <https://www.ncbi.nlm.nih.gov/pmc/articles/PMC4165826/>,  
730 doi: 10.1111/cdev.12247.
- 731 **Stawarczyk D**, Bezdek MA, Zacks JM. Event Representations and Predictive Processing: The Role of the Midline Default  
732 Network Core. *Topics in Cognitive Science*. 2021; 13(1):164–186. [https://onlinelibrary.wiley.com/doi/abs/10.1111/tops.](https://onlinelibrary.wiley.com/doi/abs/10.1111/tops.12450)  
733 [12450](https://onlinelibrary.wiley.com/doi/abs/10.1111/tops.12450), doi: 10.1111/tops.12450.
- 734 **Turesky TK**, Vanderauwera J, Gaab N. Imaging the rapidly developing brain: Current challenges for MRI studies in the  
735 first five years of life. *Developmental Cognitive Neuroscience*. 2021; 47:100893. [http://www.sciencedirect.com/science/](http://www.sciencedirect.com/science/article/pii/S1878929320301432)  
736 [article/pii/S1878929320301432](http://www.sciencedirect.com/science/article/pii/S1878929320301432), doi: 10.1016/j.dcn.2020.100893.
- 737 **Woodward AL**. Infants selectively encode the goal object of an actor's reach. *Cognition*. 1998; 69(1):1–34. doi:  
738 10.1016/S0010-0277(98)00058-4.
- 739 **Yates TS**, Ellis CT, Turk-Browne NB. The promise of awake behaving infant fMRI as a deep measure of cognition. *Current*  
740 *Opinion in Behavioral Sciences*. 2021; 40:5–11.
- 741 **Zacks JM**. Event Perception and Memory. *Annual Review of Psychology*. 2020; 71(1):165–191. [https://doi.org/10.1146/](https://doi.org/10.1146/annurev-psych-010419-051101)  
742 [annurev-psych-010419-051101](https://doi.org/10.1146/annurev-psych-010419-051101), doi: 10.1146/annurev-psych-010419-051101.
- 743 **Zacks JM**, Braver TS, Sheridan MA, Donaldson DI, Snyder AZ, Ollinger JM, Buckner RL, Raichle ME. Human brain activity  
744 time-locked to perceptual event boundaries. *Nature Neuroscience*. 2001; 4(6):651–655. [https://www.nature.com/](https://www.nature.com/articles/nn0601_651)  
745 [articles/nn0601\\_651](https://www.nature.com/articles/nn0601_651), doi: 10.1038/88486.
- 746 **Zacks JM**, Speer NK, Swallow KM, Maley CJ. The Brain's Cutting-Room Floor: Segmentation of Narrative Cinema. *Frontiers*  
747 *in Human Neuroscience*. 2010; 4. <https://www.frontiersin.org/articles/10.3389/fnhum.2010.00168/full>, doi: 10.3389/fn-  
748 [hum.2010.00168](https://www.frontiersin.org/articles/10.3389/fnhum.2010.00168/full).
- 749 **Zacks JM**, Swallow KM, Vettel JM, McAvoy MP. Visual motion and the neural correlates of event perception.  
750 *Brain Research*. 2006; 1076(1):150–162. <http://www.sciencedirect.com/science/article/pii/S0006899305019700>, doi:  
751 10.1016/j.brainres.2005.12.122.



## 752 Appendix 1

### 753 Log-likelihood simulations

754 To assess whether the log-likelihood metric would be biased to higher or lower numbers of events,  
755 we tested how well we could recover event structure in simulated data. We first generated event pat-  
756 terns (voxels by number of events) with values drawn from a standard normal distribution. Because  
757 each voxel was treated as an independent source, we used fewer voxels (5) than our actual analyses  
758 to better simulate the correlated patterns present in real fMRI data. Event labels were assigned to  
759 each of 90 timepoints. We generated 25 “participants” by applying the simulated event patterns to  
760 each timepoint with an additional noise component (cov: the covariance matrix of a multivariate nor-  
761 mal distribution). The resulting voxel by timepoint matrices were convolved with a double-gamma  
762 hemodynamic response function (HRF) using an fMRI simulation package (Ellis et al., 2020c) available  
763 in BrainIAK (Kumar et al., 2020). We followed the same analysis approach described in the Methods  
764 and Materials section to estimate the optimal number of events while simulating across a range of  
765 actual numbers. We calculated model error as the difference between the actual simulated number  
766 and the estimated optimal number.

767 With low noise (cov = 0.1), the timepoint by timepoint similarity matrices showed clear block struc-  
768 ture along the diagonal. Average error between model estimates and the correct number of events  
769 was negative ( $M = -1.10$ ,  $p < 0.001$ ), meaning that the model under-estimated the number of events  
770 (Appendix 1 Figure 1). When noise increased to a moderate level (cov = 2), model error did not signif-  
771 icantly differ from zero ( $M = 0.042$ ,  $p = 0.900$ ), that is, it did not under- or over-estimate the number  
772 of events. With high noise (cov = 20), model error was positive ( $M = 1.95$ ,  $p < 0.001$ ), indicating that  
773 the model over-estimated the number of events.

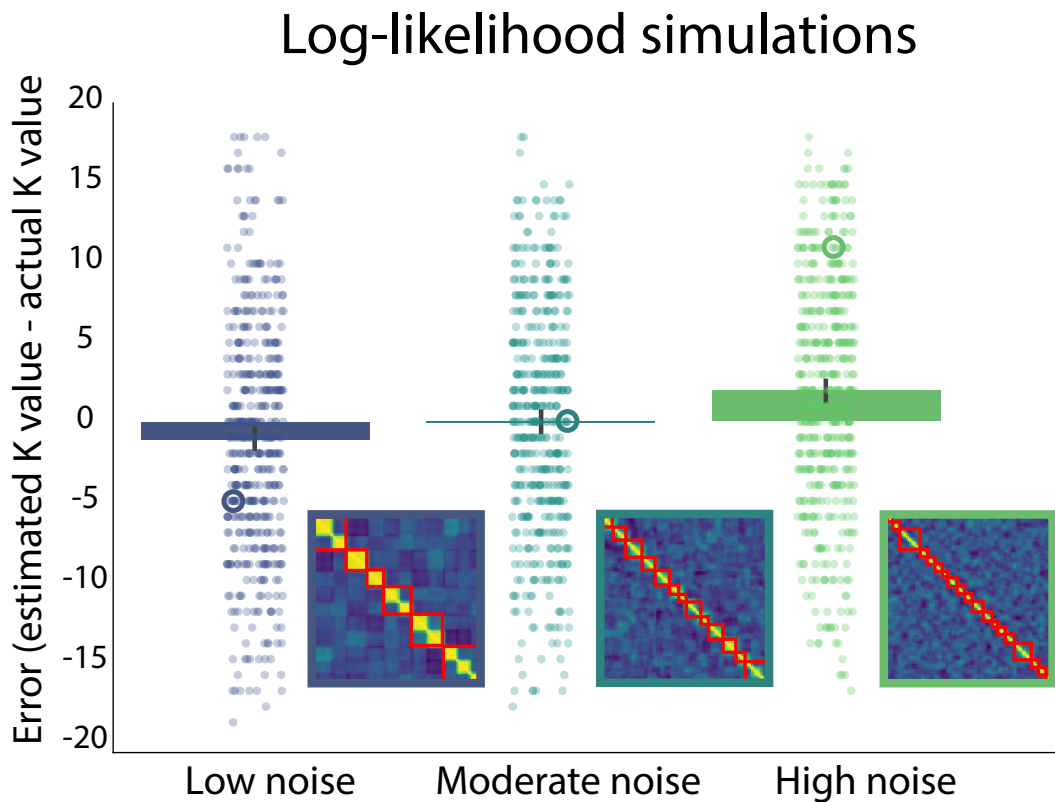

774



775 **Appendix 1 Figure 1.** Simulations of log-likelihood metric under different noise regimes. Dots represent  
776 differences between the K values that maximized the model log-likelihood and the actual simulated K values for  
777 different iterations. One example error value for each noise regime is circled, and its corresponding  
778 timepoint-by-timepoint correlation matrix is inset. Boundaries demarcating the model's best estimated K value  
779 are shown in red. In general, K values were underestimated when noise was low, guessed correctly when noise  
780 was moderate, and overestimated when noise was high.

## 782 Appendix 2

### 783 **Alternative behavioral boundary approach**

784 We tested whether voxel activity patterns for timepoints within a behavioral boundary were more cor-  
785 related than timepoints spanning a boundary by considering all possible pairs of timepoints within  
786 and across boundaries up to the temporal distance of the largest event. This approach has the  
787 advantage of using as many timepoint pairs as possible for calculating within vs. across boundary  
788 correlations, but may be vulnerable to increased noise due to comparing timepoints from different  
789 parts of the movie. Here we report a more conservative approach for testing how behavioral bound-  
790 aries predict neural data by only considering timepoint pairs that are equated in temporal distance  
791 and also “anchored” to the same timepoint. Namely, for each TR we measured the correlation be-  
792 tween the spatial activity pattern at that timepoint and timepoints forward and backward in time at  
793 a matched temporal distance. If one timepoint pair was within an event and the other was across  
794 an event, we calculated the within minus across boundary correlation. However, if both timepoint  
795 pairs were either within an event or across an event, or if one of the timepoint pairs was already  
796 included in a different calculation, the within vs. across boundary correlation was not included. We  
797 performed this for each temporal distance up to the length of the largest event and calculated the  
798 average within vs. across boundary correlation for each subject. For statistical analysis, we used the  
799 same bootstrap resampling techniques described in the Methods.

800 In adults, the searchlight analysis again showed that occipital pole, superior occipital cortex, and  
801 right supramarginal gyrus exhibited significantly greater pattern similarity within vs. across behav-  
802 ioral event boundaries (Figure 1A). In fact, the voxelwise map of the average within vs. across bound-  
803 ary correlation was highly correlated with the map using our main approach ( $r = 0.865$ ). We also  
804 found several regions showing greater pattern similarity within vs. across behavioral boundaries in  
805 infants, where again the voxelwise map was the highly correlated with our main results ( $r = 0.854$ ).

806 For the ROIs, the within vs. across behavioral boundaries were now marginal in early visual cortex  
807 and otherwise non-significant in adults (Figure 5C; EVC:  $M = 0.015$ ,  $CI = [-0.001, 0.031]$ ,  $p = 0.086$ ; LOC:  
808  $M = 0.006$ ,  $CI = [-0.011, 0.021]$ ,  $p = 0.412$ ; AG:  $M = -0.020$ ,  $CI = [-0.051, 0.009]$ ,  $p = 0.174$ ; PCC:  $M = -0.014$ ,  
809  $CI = [-0.039, 0.010]$ ,  $p = 0.292$ ; precuneus:  $M = -0.016$ ,  $CI = [-0.043, 0.010]$ ,  $p = 0.274$ ; mPFC:  $M = -0.009$ ,  
810  $CI = [-0.022, 0.005]$ ,  $p = 0.206$ ); hippocampus:  $M = -0.006$ ,  $CI = [-0.017, 0.003]$ ,  $p = 0.222$ ; EAC:  $M = 0.000$ ,  
811  $CI = [-0.010, 0.012]$ ,  $p = 0.928$ ). In infants, there were again significant results in early visual cortex  
812 and PCC, with marginally significant results in the hippocampus and EAC (EVC:  $M = 0.057$ ,  $CI = [0.018,$   
813  $0.099]$ ,  $p = 0.002$ ; LOC:  $M = 0.022$ ,  $CI = [-0.016, 0.061]$ ,  $p = 0.286$ ); AG:  $M = 0.035$ ,  $CI = [-0.012, 0.091]$ ,  $p$   
814  $= 0.174$ ); PCC:  $M = 0.046$ ,  $CI = [0.007, 0.089]$ ,  $p = 0.022$ ; precuneus:  $M = 0.025$ ,  $CI = [-0.005, 0.063]$ ,  $p =$   
815  $0.152$ ; mPFC:  $M = 0.003$ ,  $CI = [-0.030, 0.036]$ ,  $p = 0.862$ ; hippocampus:  $M = 0.035$ ,  $CI = [-0.001, 0.079]$ ,  
816  $p = 0.060$ ; EAC:  $M = 0.033$ ,  $CI = [-0.002, 0.074]$ ,  $p = 0.074$ ). Thus, the findings were largely consistent  
817 across the two approaches.

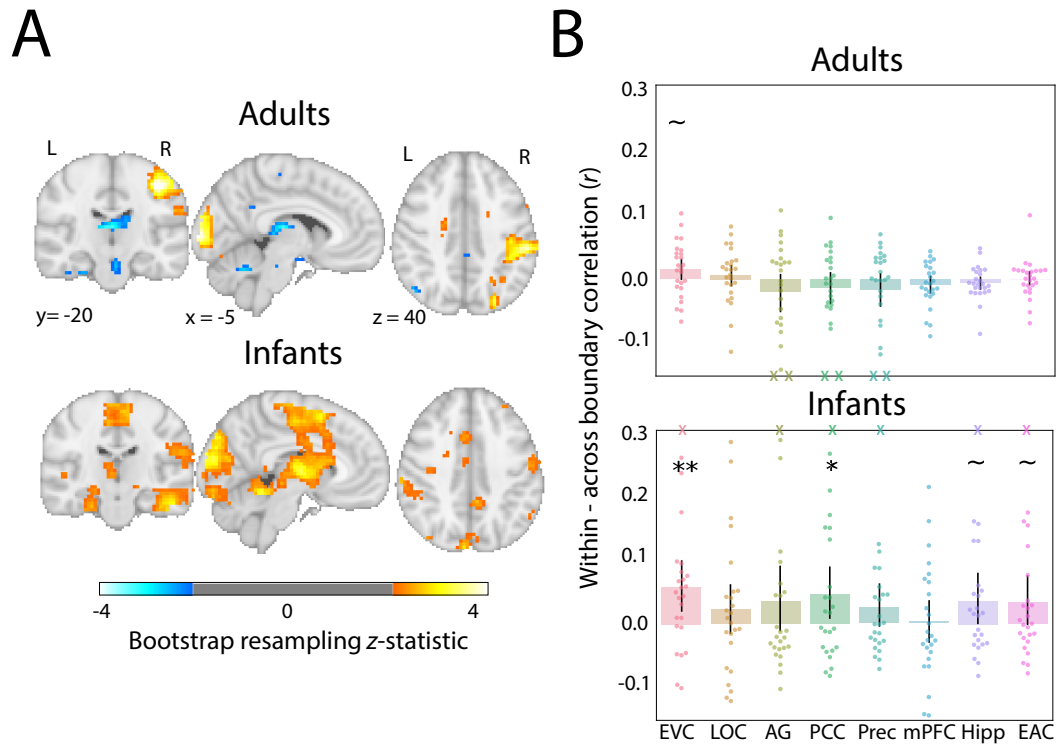

818

819

820

821

822

823

824

825

826

828

**Appendix 2 Figure 1.** Alternative approach relating behavioral boundaries to neural activity. (A) Whole-brain searchlight analysis for each age group comparing pattern similarity between timepoints drawn from within vs. across behavioral event boundaries when pairs of correlations are anchored to the same timepoint. Bootstrapped z-scores are thresholded at  $p < 0.05$ , uncorrected. (C) ROI analysis of difference in pattern similarity within minus between behavioral events. Dots represent individual participants and error bars represent 95% CIs of the mean from bootstrap resampling. Adult participants with values beyond the y-axis range for AG, PCC, and precuneus are indicated with Xs at the negative edge. Infant participants with values beyond the y-axis range for EVC, AG, PCC, precuneus, hippocampus, and EAC are indicated with Xs at the positive edge. \*\*\*  $p < 0.001$ , \*\*  $p < 0.01$ , \*  $p < 0.05$ , ~  $p < 0.1$ .

## 829 Appendix 3

### 830 Mickey dataset

831 We applied our analyses to a second, previously collected dataset of infant movie-watching. This  
832 provides a test of generalization, as the data came from a different group of infants, who spanned  
833 a wider age range, and watched a different movie. fMRI data were collected in 15 sessions (4.00  
834 – 32.60 mo;  $M = 13.92$ ,  $SD = 8.87$ ; 9 female) while infants watched a silent cartoon lasting 142 s  
835 (“Mickey”). This movie was shown on a smaller display than the Aeronaut movie, spanning 22.75  
836 visual degrees in width and 12.75 visual degrees in height. In this video, a surprise party is thrown  
837 where characters dance and play the piano while one character makes an exploding cake in the  
838 kitchen. Two infants participated twice after a delay (6.3 months and 2.3 months difference) and  
839 were treated as independent sessions. As before, additional infants with head motion above 3 mm  
840 ( $N = 5$ ) or eyes off-screen ( $N = 2$ ) for more than half of the movie were excluded. For comparison, we  
841 also collected data from 15 adults (19 – 27 years;  $M = 21.47$ ,  $SD = 2.90$ ;  $N = 10$  female) who watched  
842 the same movie. All adults and 9 infants watched the movie twice in a row. For these participants,  
843 data were averaged across the two viewings. This helped with robustness to excision of individual  
844 timepoints with excessive motion or eye closure, as the corresponding timepoint from the other  
845 viewing could be retained. Infants were collected at the Scully Center for the Neuroscience of Mind  
846 and Behavior at Princeton University ( $N = 7$ ) and the Magnetic Resonance Research Center (MRRC)  
847 at Yale University ( $N = 8$ ). Adult participants were collected at the Brain Imaging Center (BIC) at Yale  
848 University. This study was approved by the Institutional Review Board at Princeton University and  
849 the Human Investigation Committee (MRRC) and Human Subjects Committee (BIC) at Yale University.  
850 Adults provided informed consented for themselves or their child.

851 Data acquisition, preprocessing, and analyses were identical to the Aeronaut dataset with two  
852 minor variations: First, infant data were acquired at Princeton using a Siemens Skyra (3T) MRI. Sec-  
853 ond, functional images for infants were collected under a slightly different functional EPI sequence  
854 ( $TR = 2s$ ,  $TE = 28ms$ , flip angle = 71, matrix =  $64 \times 64$ , slices = 36, resolution = 3mm iso, interleaved slice  
855 acquisition). Adults were collected with the same functional sequence as Aeronaut (same as above  
856 except with  $TE = 30$ , slices = 34). Gaze coding was highly reliable: coders reported the same response  
857 on an average of 91.4% of frames ( $SD = 5.0\%$ ; range across participants = 79.7–98.4%). The average  
858 proportion of TRs retained after exclusion for looking off screen was high in adults ( $M = 99.3\%$ ,  $SD =$   
859  $1.6\%$ ; range across participants = 93.9–100%) and infants ( $M = 89.1\%$ ,  $SD = 13.0\%$ ; range across par-  
860 ticipants = 58.1–100%). Eye-tracking data were not collected for one infant because of experimenter  
861 error. Timepoints with less than 3mm of translational motion were included (infants:  $M = 91.2\%$ ,  $SD$   
862  $= 10.7\%$ , range across participants = 64.9%–100%; adults: 100% for all participants).

In the whole-brain analysis, ISC was again strongest in visual regions for both adults and infants (Appendix 2 Figure 1). In the ROI analysis, adult ISC was significant in EVC ( $M = 0.468$ ,  $CI = [0.420, 0.516]$ ,  $p < 0.001$ ), LOC ( $M = 0.383$ ,  $CI = [0.330, 0.438]$ ,  $p < 0.001$ ), AG ( $M = 0.151$ ,  $CI = [0.121, 0.186]$ ,  $p < 0.001$ ), PCC ( $M = 0.187$ ,  $CI = [0.114, 0.264]$ ,  $p < 0.001$ ), precuneus ( $M = 0.227$ ,  $CI = [0.177, 0.281]$ ,  $p < 0.001$ ) and EAC ( $M = 0.045$ ,  $CI = [0.006, 0.084]$ ,  $p = 0.026$ ); marginal in mPFC ( $M = 0.031$ ,  $CI = [-0.004, 0.066]$ ,  $p = 0.088$ ); and not significant in hippocampus ( $M = 0.011$ ,  $CI = [-0.010, 0.030]$ ,  $p = 0.290$ ). Infant ISC was significant in EVC ( $M = 0.076$ ,  $CI = [0.032, 0.123]$ ,  $p < 0.001$ ), LOC ( $M = 0.039$ ,  $CI = [0.009, 0.073]$ ,  $p = 0.019$ ); significant or marginal in a negative direction (likely noise) in AG ( $M = -0.039$ ,  $CI = [-0.085, 0.002]$ ,  $p = 0.084$ ), PCC ( $M = -0.066$ ,  $CI = [-0.127, -0.007]$ ,  $p = 0.037$ ), and EAC ( $M = -0.049$ ,  $CI = [-0.082, -0.016]$ ,  $p = 0.002$ ); and not significant in precuneus ( $M = -0.014$ ,  $CI = [-0.060, 0.032]$ ,  $p = 0.575$ ), mPFC ( $M = 0.000$ ,  $CI = [-0.035, 0.036]$ ,  $p = 0.994$ ), or hippocampus ( $M = 0.050$ ,  $CI = [-0.014, 0.114]$ ,  $p = 0.129$ ). ISC was significantly greater in adults than infants in EVC ( $M = 0.393$ , permutation  $p < 0.001$ ), LOC ( $M = 0.344$ ,  $p < 0.001$ ), AG ( $M = 0.190$ ,  $p < 0.001$ ), PCC ( $M = 0.252$ ,  $p < 0.001$ ), precuneus ( $M = 0.240$ ,  $p < 0.001$ ), and EAC ( $M = 0.094$ ,  $p = 0.003$ ); and not significantly different in mPFC ( $M = 0.031$ ,  $p = 0.238$ )

874

875

876

877

and hippocampus ( $M = -0.039$ ,  $p = 0.298$ ).

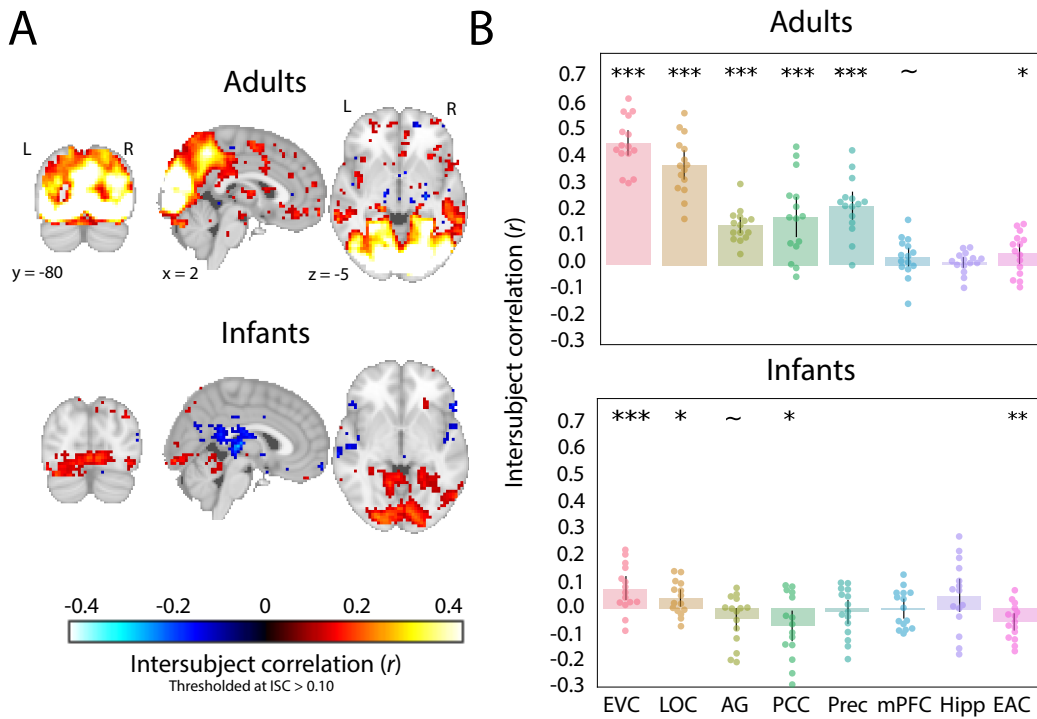

878

879

880

881

882

883

**Appendix 3 Figure 1.** Average leave-one-out intersubject correlation (ISC) in adults and infants watching the Mickey movie. (A) Whole-brain voxel-wise ISC values in the two groups, thresholded for visualization purposes at voxels with correlation values greater than 0.10. (B) ISC values in the ROIs, with the mean at the column height. Dots represent individual participants and error bars represent 95% CIs of the mean from bootstrap resampling. \*\*\*  $p < 0.001$ , \*\*  $p < 0.01$ , ~  $p < 0.1$ .

885

886

887

888

889

890

891

892

893

894

895

896

897

898

899

900

901

902

In the searchlight analysis, we applied an HMM to one half of adult or infant participants using a range of event numbers from 2 to 18 and then tested on the second half. This maximum number of events ensured that at least some events were several TRs long, but was less than Aeronaut because the Mickey movie was shorter. Log-likelihood was again used to assess model fit. Similar to our main analyses, sensory regions of the adult brain had more events than higher level regions, although there were fewer events overall (Appendix 2 Figure 2). We replicated the lack of a gradient of event processing in infants, with the optimal number of events generally low across the brain.

In the nested analysis for reliability of event structure, most ROIs were significant in adults, including EVC ( $M = 3.98$ ,  $CI = [3.66, 4.31]$ ,  $p < 0.001$ ), LOC ( $M = 4.35$ ,  $CI = [3.87, 4.77]$ ,  $p < 0.001$ ), AG ( $M = 1.72$ ,  $CI = [0.515, 2.96]$ ,  $p = 0.010$ ), PCC ( $M = 3.59$ ,  $CI = [2.62, 4.45]$ ,  $p < 0.001$ ), precuneus ( $M = 4.42$ ,  $CI = [3.97, 4.88]$ ,  $p < 0.001$ ), and EAC ( $M = 2.69$ ,  $CI = [1.56, 3.80]$ ,  $p < 0.001$ ); but not mPFC ( $M = 0.157$ ,  $CI = [-1.21, 1.42]$ ,  $p = 0.840$ ) or hippocampus ( $M = 0.273$ ,  $CI = [-0.822, 1.37]$ ,  $p = 0.724$ ). In infants, reliable event structure was found in EVC ( $M = 2.04$ ,  $CI = [0.972, 2.97]$ ,  $p < 0.001$ ), LOC ( $M = 2.85$ ,  $CI = [1.83, 3.77]$ ,  $p < 0.001$ ), precuneus ( $M = 3.42$ ,  $CI = [2.23, 4.30]$ ,  $p < 0.001$ ), mPFC ( $M = 2.56$ ,  $CI = [1.38, 3.63]$ ,  $p < 0.001$ ), and hippocampus ( $M = 1.31$ ,  $CI = [0.366, 2.13]$ ,  $p = 0.002$ ); marginal in EAC ( $M = 0.846$ ,  $CI = [-0.047, 1.74]$ ,  $p < 0.035$ ); and not in AG ( $M = 0.735$ ,  $CI = [-0.097, 1.65]$ ,  $p = 0.100$ ) or PCC ( $M = 0.399$ ,  $CI = [-0.364, 1.22]$ ,  $p = 0.306$ ). By generalizing to a different movie with distinct samples across a wider infant age range, these results provide further evidence for coarser event representations in infancy.

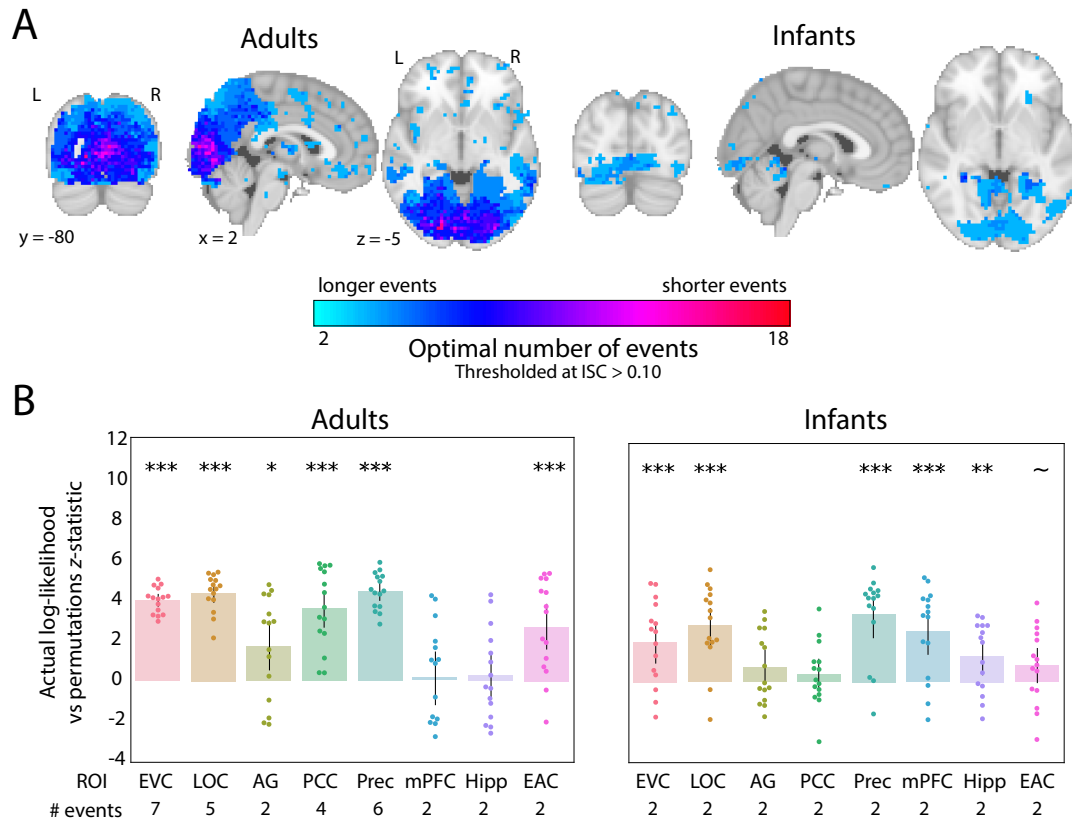

903

904

905

906

907

908

909

910

**Appendix 3 Figure 2.** Event structure and reliability for the Mickey movie. (A) The optimal number of events plotted across the brains of adults and infants. Voxels with an average ISC value greater than 0.10 are plotted for visualization purposes. (B) Results of the nested cross-validation procedure for computing the reliability of event segmentation in ROIs for adults and infants, calculated as the z-statistic comparing actual and permuted participant data. The number of events that optimized model log-likelihood in the full sample of participants is labeled below the x-axis. Dots represent individual participants and error bars represent 95% CIs of the mean from bootstrap resampling. \*\*\*  $p < 0.001$ , \*\*  $p < 0.01$ , \*  $p < 0.05$ .



## 912 Appendix 4

### 913 Nonlinear alignment

914 In our main analyses, we used a linear alignment procedure for infant anatomical images (with manual  
915 adjustments). However, dramatic developmental differences within and across ages raise the  
916 possibility that a nonlinear approach may be more appropriate. We thus used ANTS (Avants et al.,  
917 2011) to re-align infant and adult brain data from the Aeronaut dataset to adult anatomical data. We  
918 then repeated the whole-brain ISC analyses and the searchlight analyses of optimal event number.  
919 For both adults and infants, the results were unchanged: ISC was highest in visual regions in both  
920 adults and infants (Appendix 3 Figure 1A) and there was a gradient in the number of events that max-  
921 imized the model log-likelihood in adults but not infants (Appendix 3 Figure 1B). Thus, our results are  
922 robust to these procedures for aligning between infant and adult brains.

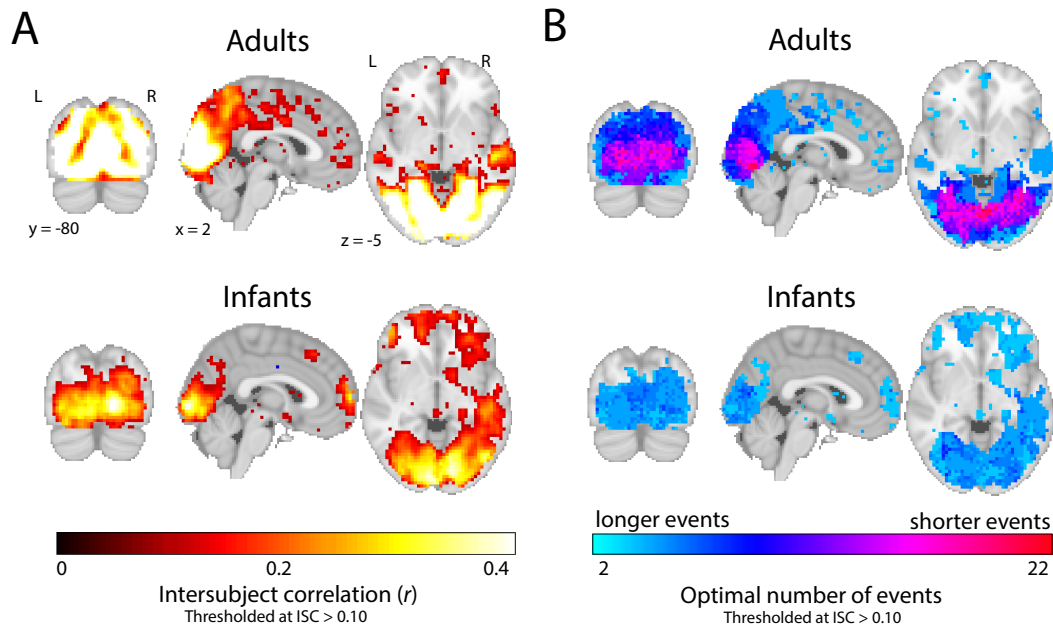

923 **Appendix 4 Figure 1.** Results from nonlinear anatomical alignment. (A) Whole-brain voxel-wise ISC values in the  
924 two groups. (B) The optimal number of events for a given voxel was determined via a searchlight analysis across  
925 the brain, which found the number of events that maximized the model log-likelihood in held-out data. In both  
926 panels, voxels with an average ISC value greater than 0.10 are plotted for visualization purposes.  
927
